# Supplementary material for: Development of a simple high-throughput assay for directed evolution of enantioselective sulfoxide reductases
Source: Royal Society of Chemistry journal article supplement (doi:10.1039/d0cc01660h), 2020-01-01

## Supporting information

# Development of a Simple High-Throughput Assay for Directed Evolution of Enantioselective Sulfoxide Reductases

Vincenzo Tarallo, Kasireddy Sudarshan, Vladimír Nosek and Jiří Míšek\*

Department of Organic Chemistry, Faculty of Science, Charles University, Hlavova 2030/8, 12843 Prague 2, Czech Republic

E-mail: [misek@natur.cuni.cz](mailto:misek@natur.cuni.cz)

### Table of Contents:

|                                                                                                                                     |    |
|-------------------------------------------------------------------------------------------------------------------------------------|----|
| 1. General .....                                                                                                                    | 2  |
| 2. Preparation of 4-(Propylthio)benzaldehyde ( <b>5a</b> ).....                                                                     | 3  |
| 3. General Procedure for the Oxidation of 4-(Alkylthio)benzaldehydes to Sulfoxides .....                                            | 3  |
| 4. General Procedure for the Knoevenagel Condensation .....                                                                         | 4  |
| 5. Absorption and Fluorescence Spectra of Propyl GreenOx ( <b>4a</b> ), Methyl GreenOx ( <b>4b</b> ), <b>3a</b> and <b>3b</b> ..... | 6  |
| 6. Quantum Yields Determination .....                                                                                               | 6  |
| 7. Preparation of MsrA.....                                                                                                         | 8  |
| 8. Preparation of a Library and Screening.....                                                                                      | 9  |
| 9. Preparation of F52L single mutant of MsrA .....                                                                                  | 10 |
| 10. MsrA Activity Assay.....                                                                                                        | 11 |
| 11. General Procedure for the Kinetic Resolution of Racemic Sulfoxides with Wild Type and F52L MsrA .....                           | 11 |
| 12. References .....                                                                                                                | 14 |
| 13. HPLC Traces: Kinetic Resolution with MsrA (WT and F52L).....                                                                    | 15 |
| 14. NMR Spectra.....                                                                                                                | 22 |

## 1. General

All starting reagents were commercially available and of analytical purity, which were used without further treatment unless otherwise stated. Racemic sulfoxides were prepared according to the literature procedures<sup>1,2</sup> unless otherwise stated. Solvents were dried according to standard methods. <sup>1</sup>H NMR spectra were obtained at 400 MHz. <sup>13</sup>C NMR spectra were obtained at 101 MHz and were <sup>1</sup>H decoupled. <sup>19</sup>F NMR spectra were obtained at 376 MHz. Chemical shifts ( $\delta$ ) are reported in ppm relative to the residual solvent peak or internal solvent peak ((CD<sub>3</sub>)<sub>2</sub>SO:  $\delta_{\text{H}}$  = 2.50,  $\delta_{\text{C}}$  = 39.5; CDCl<sub>3</sub>:  $\delta_{\text{H}}$  = 7.26,  $\delta_{\text{C}}$  = 77.2, CD<sub>3</sub>OD:  $\delta_{\text{H}}$  = 3.31,  $\delta_{\text{C}}$  = 49.0) Chemical shifts for <sup>19</sup>F NMR are reported in terms of chemical shift in reference to an internal standard (fluorobenzene set to  $\delta$  -112.96 ppm). Accurate mass measurements (HRMS) were obtained by ESI on an Agilent 6530 Q-TOF MS spectrometer. UV–Vis absorption spectra were recorded on a BioDrop Touch spectrophotometer. Analytical HPLC was performed under the following conditions: Agilent Eclipse plus C18 column (3.5  $\mu$ L, 4.6 $\times$ 100 mm); UV/Vis detection at  $\lambda_{\text{obs}}$  = 254 nm or 220 nm; flow rate 0.4 mL/min; gradient elution method (0.1% aqueous formic acid – CH<sub>3</sub>CN from 95:5 to 0:100 in 13 min. Analytical TLC was performed using a precoated silica gel 60 Å F<sub>254</sub> plates (0.2 mm thickness) and visualized by irradiation with UV light at 254 nm or by dipping in stain solution (KMnO<sub>4</sub>, CAM) followed by heating. Preparative column chromatography was carried out using silica gel 60 Å (particle size 0.063–0.200mm). Enantiomeric excesses were determined by chiral HPLC analysis using Daicel Chiralpak (IA, IC) and Chiralcel OD-H columns and a mixture of *n*-heptane/propan-2-ol as the eluent. The detailed conditions are given at the characterization part of the products. The absolute configurations of the products were determined by the comparison of chiral HPLC retention times with the literature. Selectivity factor *s* was calculated according to formula  $s = \ln[(1-c)(1-ee)]/\ln[(1-c)(1+ee)]$ .<sup>3</sup> Purifications by HPLC were performed under the following conditions: Agilent ZORBAX SBC18 column (5  $\mu$ L, 9.4 $\times$ 150 mm); UV/Vis detection at  $\lambda_{\text{obs}}$  = 254 nm; flow rate 4 mL/min; gradient elution method (0.1% aqueous trifluoroacetic acid – CH<sub>3</sub>CN from 95:5 to 0:100 in 20 min. Oligonucleotides were purchased from Sigma-Aldrich, restriction endonucleases and other enzymes for DNA cloning and mutagenesis were purchased from New England Biolabs or Agilent Technologies.

## 2. Preparation of 4-(Propylthio)benzaldehyde (**5a**)

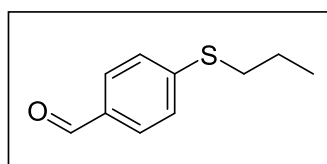

4-(propylthio)benzaldehyde **5a** was prepared according to a reported protocol.<sup>4</sup> A mixture of 1,2-ethanedithiol (188 mg, 2.0 mmol), 4-bromobenzaldehyde (185 mg, 1.0 mmol), CuSO<sub>4</sub>·5H<sub>2</sub>O (13 mg, 0.05 mmol), Cs<sub>2</sub>CO<sub>3</sub> (1.625 g, 5.0 mmol) in DMSO (2 mL) was stirred at 90 °C for 20 h under argon atmosphere. Then, the reaction mixture was cooled to the room temperature and 1-iodopropane (510 mg, 3 mmol) in DMF (1 mL) was added. The reaction mixture was stirred for another 5 h at room temperature, then diluted with water and extracted with EtOAc. Combined organic phase was washed with water, brine, dried over MgSO<sub>4</sub> and concentrated by rotary evaporation under reduced pressure. The crude product was purified by column chromatography on silica gel (cyclohexane/EtOAc=8:1) to afford **5a** in 83 % yield (150 mg) as a yellow-brown liquid: *R<sub>f</sub>* 0.7 (cyclohexane/EtOAc=4:1). <sup>1</sup>H NMR (400 MHz, CDCl<sub>3</sub>) δ 9.90 (s, 1H), 7.76 – 7.71 (m, 2H), 7.36 – 7.31 (m, 2H), 2.98 (t, *J* = 7.3, 2H), 1.74 (m, 2H), 1.06 (t, *J* = 7.3 Hz, 3H). <sup>13</sup>C NMR (101 MHz, CDCl<sub>3</sub>) δ 191.3, 147.2, 133.2, 130.1, 126.5, 33.9, 22.2, 13.6. HRMS (ESI): *m/z* [M+H]<sup>+</sup> calcd for C<sub>10</sub>H<sub>13</sub>OS 181.0682, found: 181.0663.

## 3. General Procedure for the Oxidation of 4-(Alkylthio)benzaldehydes to Sulfoxides

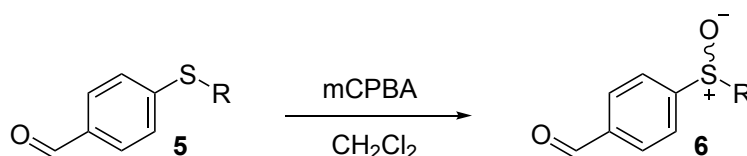

To a solution of 4-(alkylthio)benzaldehydes (2.0 mmol) in CH<sub>2</sub>Cl<sub>2</sub> (20 mL) 3-chloroperbenzoic acid (415 mg, 2.4 mmol) was added portionwise at 0 °C over the period of 10 min. The reaction mixture was stirred at room temperature for 1 h. Then, the reaction mixture was diluted with CH<sub>2</sub>Cl<sub>2</sub> (30 mL) and extracted with aqueous Na<sub>2</sub>SO<sub>3</sub> (saturated solution, 2 × 30 mL), aqueous NaHCO<sub>3</sub> (1M solution, 2 × 30 mL), water, brine, dried over MgSO<sub>4</sub> and concentrated by rotary evaporation under reduced pressure. The crude product was purified by column chromatography on silica gel.

### 4-(Propylsulfinyl)benzaldehyde (**6a**)

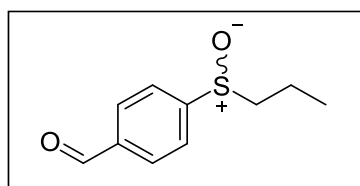

C<sub>10</sub>H<sub>12</sub>O<sub>2</sub>S (196.26 g/mol), 180 mg, pale yellow solid, *R<sub>f</sub>* 0.3 (cyclohexane/EtOAc=2:3), 46 % yield. <sup>1</sup>H NMR (400 MHz, CDCl<sub>3</sub>) δ 10.06 (s, 1H), 8.05 – 7.97 (m, 2H), 7.81 – 7.73 (m, 2H), 2.84 – 2.75 (m, 2H), 1.90 – 1.77 (m, 1H), 1.71 – 1.56 (m, 1H), 1.04 (t, *J* = 7.4 Hz, 3H). <sup>13</sup>C NMR (101 MHz, CDCl<sub>3</sub>) δ 191.3, 151.1, 138.2, 130.3, 124.8, 59.1, 15.9, 13.3. HRMS (ESI): *m/z* [M+H]<sup>+</sup> calcd for C<sub>10</sub>H<sub>13</sub>O<sub>2</sub>S 197.0631, found: 197.0635.

#### 4-(Methylsulfinyl)benzaldehyde (6b)

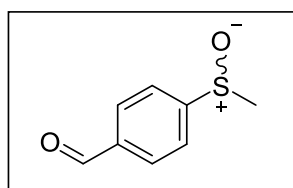

$C_8H_8O_2S$  (168.21 g/mol), 161 mg, white solid,  $R_f$  0.3 (cyclohexane/EtOAc=2:3), 48 % yield.  $^1H$  NMR (400 MHz,  $CDCl_3$ )  $\delta$  10.05 (s, 1H), 8.05 – 7.97 (m, 2H), 7.83 – 7.75 (m, 2H), 2.74 (s, 3H).  $^{13}C$  NMR (101 MHz,  $CDCl_3$ )  $\delta$  191.2, 152.6, 138.2, 130.5, 124.3, 43.9. The spectra are in agreement with reported data.<sup>5</sup>

#### 4. General Procedure for the Knoevenagel Condensation

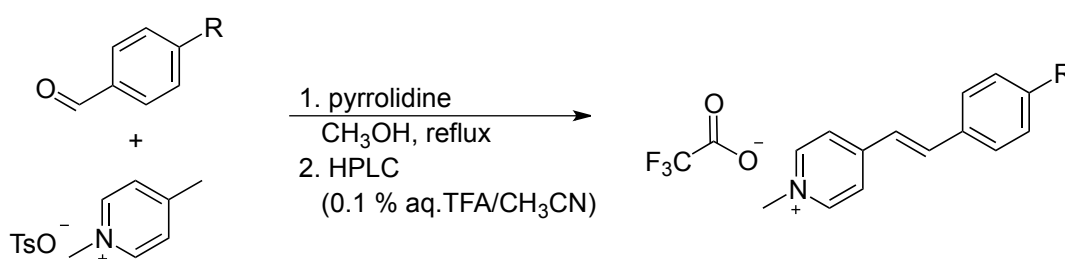

This procedure used a modification of the reported protocol.<sup>6</sup> Pyrrolidine (19 mg, 269  $\mu$ mol) was added to the mixture of 1,4-dimethylpyridinium p-toluenesulfonate (50 mg, 179  $\mu$ mol) and an aldehyde (538  $\mu$ mol) in MeOH (4 mL) under argon atmosphere. The reaction mixture was refluxed for 4 h. After cooling to room temperature, the mixture was concentrated by rotary evaporation under reduced pressure, the solid residue was washed with EtOAc ( $3 \times 30$  mL) and further purified by HPLC and lyophilized.

#### (E)-1-Propyl-4-(4-(methylthio)styryl)pyridin-1-ium 2,2,2-trifluoroacetate (3a)

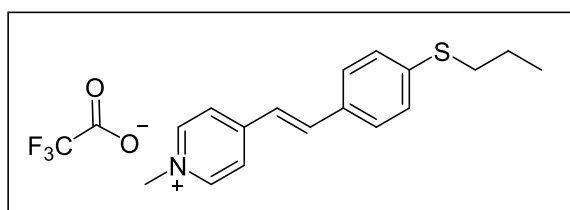

$C_{19}H_{20}F_3NO_2S$  (383.43 g/mol), 59 mg, pale yellow solid,  $R_f$  0.7 (MeOH/ $NH_4Cl$  aq. (2M)/ $MeNO_2$  7:2:1), 87 % yield. HPLC  $t_R$  12.7 min.  $^1H$  NMR (400 MHz,  $(CD_3)_2SO$ )  $\delta$  8.84 (d,  $J = 6.8$  Hz, 2H), 8.18 (d,  $J = 6.8$  Hz, 2H), 7.97 (d,  $J = 16.3$  Hz, 1H), 7.71 – 7.63 (m, 2H), 7.46 (d,  $J = 16.3$  Hz, 1H), 7.43 – 7.35 (m, 2H), 4.24 (s, 3H), 3.03 (t,  $J = 7.2$  Hz, 2H), 1.70 – 1.59 (m, 2H), 1.00 (t,  $J = 7.3$  Hz, 3H).  $^{13}C$  NMR (101 MHz,  $(CD_3)_2SO$ )  $\delta$  152.5, 145.0, 140.4, 140.1, 131.95, 128.6, 127.1, 123.3, 122.3, 46.8, 33.0, 21.8, 13.2.  $^{19}F$  NMR (376 MHz,  $(CD_3)_2SO$ )  $\delta$  -74.34. HRMS (ESI):  $m/z$   $[M]^+$  calcd for  $C_{17}H_{20}NS$  270.1311, found: 270.1303. UV-Vis  $\lambda_{max}$  (phosphate buffer, pH = 7.4): 380 nm ( $\epsilon/M^{-1}cm^{-1}$ : 19600).

**(E)-1-Methyl-4-(4-(methylthio)styryl)pyridin-1-ium 2,2,2-trifluoroacetate (3b)**

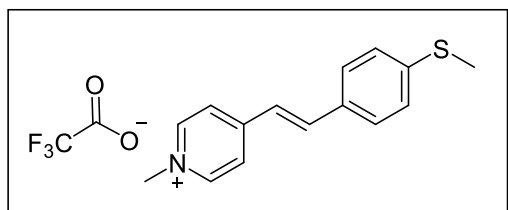

$C_{17}H_{16}F_3NO_2S$  (355.37 g/mol), 37 mg, pale yellow solid,  $R_f$  0.7 (MeOH/NH<sub>4</sub>Cl aq. (2M)/MeNO<sub>2</sub> 7:2:1), 58 % yield. HPLC  $t_R$  10.7 min. <sup>1</sup>H NMR (400 MHz, CD<sub>3</sub>OD)  $\delta$  8.74 – 8.61 (m, 2H), 8.19 – 8.07 (m, 2H), 7.89 (d,  $J$  = 16.3 Hz, 1H), 7.74 – 7.60 (m, 2H), 7.37 (d,  $J$  = 16.3 Hz, 1H), 7.34 – 7.28 (m, 2H), 4.30 (s, 3H), 2.54 (s, 3H). <sup>13</sup>C NMR (101 MHz, CD<sub>3</sub>OD)  $\delta$  155.4, 146.0, 144.6, 142.6, 132.9, 129.8, 127.0, 124.8, 122.6, 47.6, 14.9. <sup>19</sup>F NMR (376 MHz, (CD<sub>3</sub>OD))  $\delta$  -76.92. HRMS (ESI):  $m/z$  [M]<sup>+</sup> calcd for C<sub>15</sub>H<sub>16</sub>NS 242.0998, found: 242.0993. UV-Vis  $\lambda_{max}$  (phosphate buffer, pH = 7.4): 380 nm ( $\epsilon/M^{-1}cm^{-1}$ : 21880).

**(E)-1-Propyl-4-(4-(methylsulfinyl)styryl)pyridin-1-ium 2,2,2-trifluoroacetate (4a)- Propyl GreenOx**

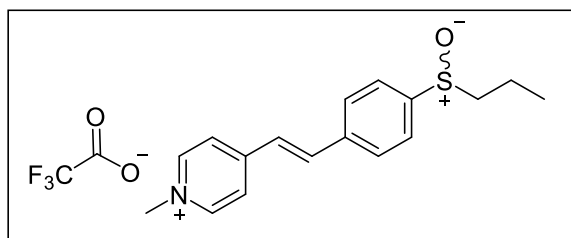

$C_{19}H_{20}F_3NO_3S$  (399.43 g/mol), 60 mg, pale yellow solid,  $R_f$  0.6 (MeOH/NH<sub>4</sub>Cl aq. (2M)/MeNO<sub>2</sub> 7:2:1), 84 % yield. HPLC  $t_R$  8.1 min. <sup>1</sup>H NMR (400 MHz, (CD<sub>3</sub>)<sub>2</sub>SO)  $\delta$  8.96 – 8.86 (m, 2H), 8.29 – 8.20 (m, 2H), 8.06 (d,  $J$  = 16.4 Hz, 1H), 7.96 – 7.86 (m, 2H), 7.80 – 7.70 (m, 2H), 7.64 (d,  $J$  = 16.4 Hz, 1H), 4.27 (s, 3H), 2.98 (ddd,  $J$  = 13.3, 9.2, 6.4 Hz, 1H), 2.80 (ddd,  $J$  = 13.2, 9.2, 6.4 Hz, 1H), 1.76 – 1.58 (m, 1H), 1.58 – 1.40 (m, 1H), 0.97 (t,  $J$  = 7.4 Hz, 3H). <sup>13</sup>C NMR (101 MHz, (CD<sub>3</sub>)<sub>2</sub>SO)  $\delta$  152.0, 146.2, 145.3, 139.2, 137.3, 128.5, 125.0, 124.7, 123.8, 57.1, 47.0, 15.1, 12.9. <sup>19</sup>F NMR (376 MHz, (CD<sub>3</sub>)<sub>2</sub>SO)  $\delta$  -74.50. HRMS (ESI):  $m/z$  [M]<sup>+</sup> calcd for C<sub>17</sub>H<sub>20</sub>NOS 286.1260, found: 286.1284. UV-Vis  $\lambda_{max}$  (phosphate buffer, pH = 7.4): 340 nm ( $\epsilon/M^{-1}cm^{-1}$ : 29900).

**(E)-1-Methyl-4-(4-(methylsulfinyl)styryl)pyridin-1-ium 2,2,2-trifluoroacetate (4b)- Methyl GreenOx**

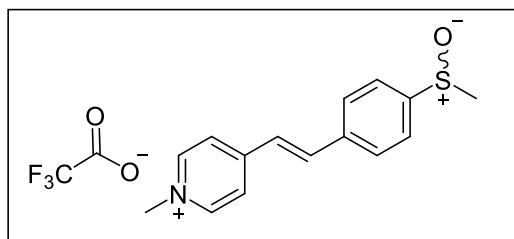

$C_{17}H_{16}F_3NO_3S$  (371.37 g/mol), 41 mg, pale yellow solid,  $R_f$  0.6 (MeOH/NH<sub>4</sub>Cl aq. (2M)/MeNO<sub>2</sub> 7:2:1), 61 % yield. HPLC  $t_R$  6.9 min. <sup>1</sup>H NMR (400 MHz, DMSO-*d*<sub>6</sub>)  $\delta$  8.94 – 8.86 (m, 2H), 8.30 – 8.21 (m, 2H), 8.06 (d,  $J$  = 16.4 Hz, 1H), 7.97 – 7.90 (m, 2H), 7.85 – 7.77 (m, 2H), 7.64 (d,  $J$  = 16.4 Hz, 1H), 4.27 (s, 3H), 2.79 (s, 3H). <sup>13</sup>C NMR (101 MHz, DMSO-*d*<sub>6</sub>)  $\delta$  152.0, 148.2, 145.3, 139.2, 137.3, 128.6, 125.0, 124.4, 123.8, 47.0, 43.0. <sup>19</sup>F NMR (376 MHz, (CD<sub>3</sub>)<sub>2</sub>SO)  $\delta$  -74.36. HRMS (ESI):  $m/z$  [M]<sup>+</sup> calcd for C<sub>15</sub>H<sub>16</sub>NOS 258.0947, found: 258.0930. UV-Vis  $\lambda_{max}$  (phosphate buffer, pH = 7.4): 340 nm ( $\epsilon/M^{-1}cm^{-1}$ : 32200).

## 5. Absorption and Fluorescence Spectra of Propyl GreenOx (4a), Methyl GreenOx (4b), 3a and 3b

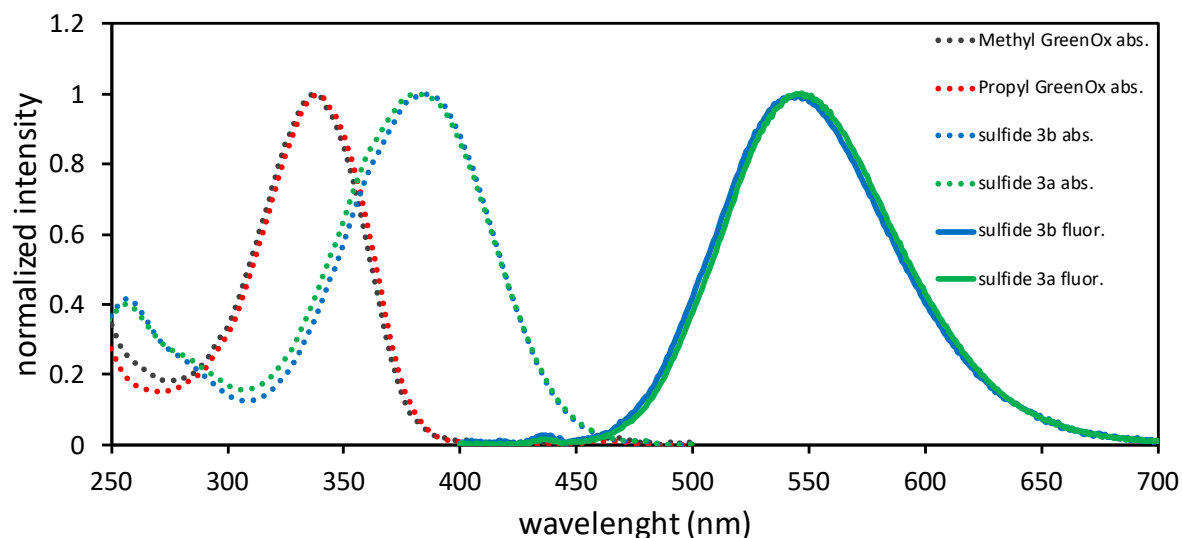

**Figure S1.** Normalized absorption and emission spectra ( $\lambda_{\text{exc}} = 380 \text{ nm}$ ) of Propyl GreenOx (4a), Methyl GreenOx (4b), 3a and 3b recorded in phosphate buffer (pH 7.4) at room temperature.

## 6. Quantum Yields Determination

Quantum yields were calculated by measuring the integrated emission area of the fluorescence spectra when excited at 380 nm in PBS and comparing it to the area measured for fluorescein in 0.1 M NaOH when excited at 470 nm ( $\Phi = 0.92$ ).<sup>7</sup> Quantum yields were calculated using the equation:  $\Phi_X = \Phi_S \left( \frac{\text{Grad}_X}{\text{Grad}_S} \right) \left( \frac{\eta_X^2}{\eta_S^2} \right)$ , where *Grad* the gradient from the plot of integrated fluorescence intensity vs absorbance and  $\eta$  the refractive index of the solvent. The subscript *S* and *X* represent the standard dye (fluorescein) and the tested dye, respectively. For the determination of the relative fluorescence quantum yields in solution only dilute solutions with an absorbance below 0.1 at the excitation wavelength (470 nm or 380 nm) were used.

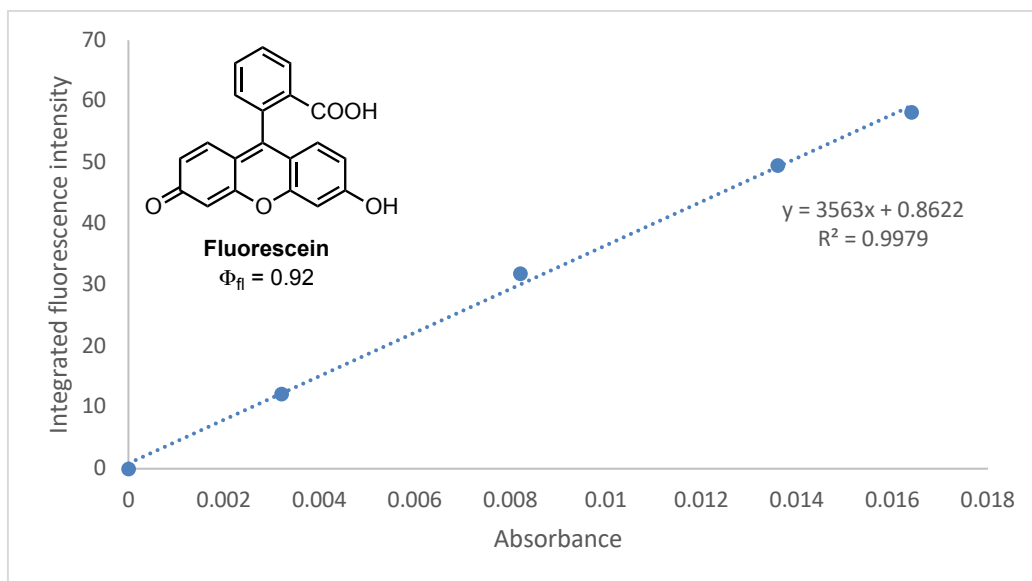

**Figure S2.** Plot of integrated fluorescence intensity vs absorbance of fluorescein.

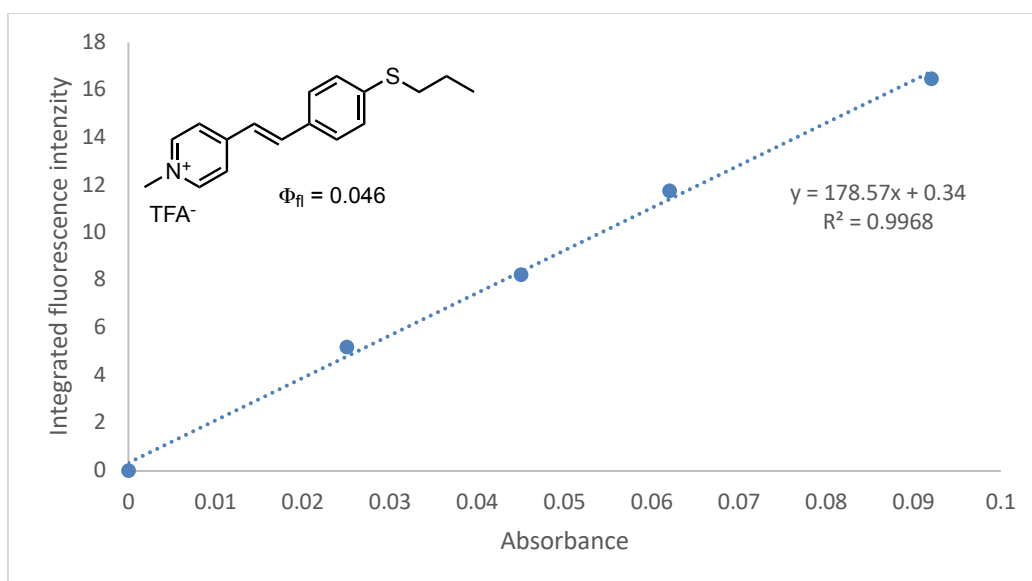

**Figure S3.** Plot of integrated fluorescence intensity vs absorbance of sulfide **3a**.

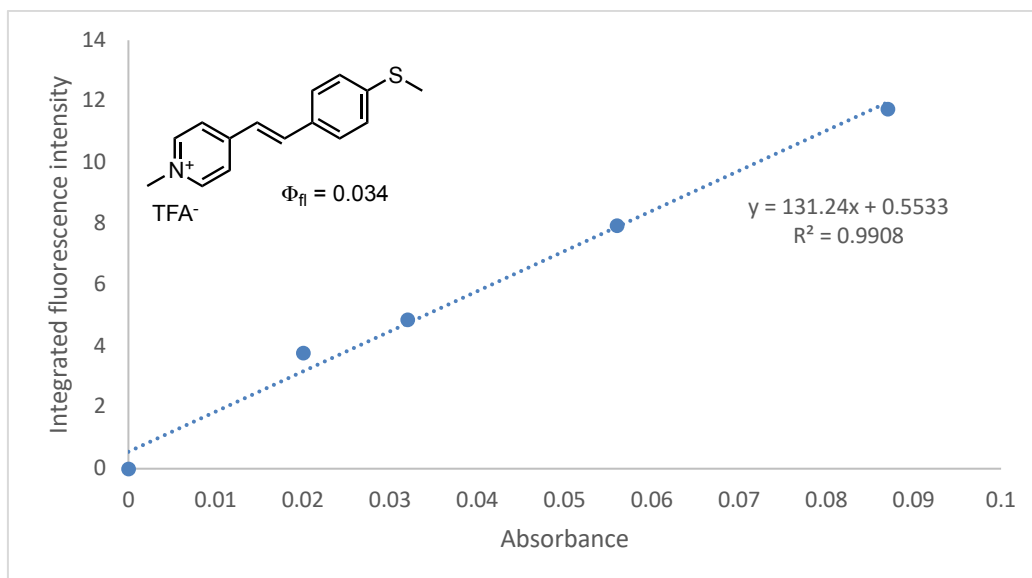

**Figure S4.** Plot of integrated fluorescence intensity vs absorbance of sulfide **3b**.

## 7. Preparation of MsrA

NdeI/XhoI ends were added to a 639 bp fragment containing the complete methionine sulfoxide reductase A gene (*msrA*) with PCR (Red Taq2x Master Mix, VWR) using two primers (5'-ATACATATGAGTTTATTTGATAAAAAGCATCTGGT and 5'-AATACTCGAGCTATGCTTCCGGCGGC) and pGEX/MsrA<sup>8</sup> construct as a template. The amplified fragment was cloned into pET-16b vector (GenScript), previously cut with NdeI/XhoI restriction endonucleases. Ligated vector was used to transform *E. coli* 5-alpha competent (New England Biolabs) via electroporation. 100  $\mu$ L of the electroporation mixture was plated on LB agar plate with ampicillin (100  $\text{mgL}^{-1}$ ). 10 single colonies were selected and the correct sequence of the construct was confirmed by DNA sequencing analysis. This construct of *msrA* in pET-16b vector was used to transform *E. coli* BL21 (DE3) cells (Agilent Technologies). A 25 mL preculture of transformed *E. coli* BL21 (DE3) cells was used to inoculate 400 mL of LB medium with ampicillin (100  $\text{mgL}^{-1}$ ). The bacterial culture was incubated at 37 °C, 200 rpm until  $OD_{600}$  reached 0.8. Then, the production of the enzyme was induced with 0.5 mM IPTG, and the culture was incubated at 37 °C, 200 rpm for an additional 3 h until. Cells were then harvested by centrifugation (3 500  $\times$  g for 30 min at 4 °C). The cell pellet was suspended in PBS buffer (10 mM  $\text{Na}_2\text{HPO}_4$ , 1.8 mM  $\text{KH}_2\text{PO}_4$ , 2.7 mM KCl, 140 mM NaCl, pH 7.3) and lysed by sonication. Cell debris was removed by centrifugation (4 000  $\times$  g for 30 min at 4 °C), the soluble fraction was filtered with 0.22  $\mu$ m filter and loaded onto Nickel agarose column (Ni-NTA Agarose, Invitrogen) and the resulting suspension was gently mixed for 30 min at room temperature. The column was washed with 3  $\times$  10 bed volumes of loading buffer (50 mM sodium phosphate, 300 mM sodium chloride, 10 mM imidazole, pH 8.0) and finally the protein was eluted with 3  $\times$  1 bed volume of elution buffer (50 mM sodium phosphate, 300 mM sodium chloride, 300 mM imidazole, pH 8.0). Elution buffer was exchanged to Tris buffer (50 mM Tris-HCl buffer, pH 8.0) with Amicon Ultra-15 centrifugal



filter (10 000 NMWL). This procedure typically yielded ~20 mg of protein per liter of culture. Protein concentration was determined from the absorbance at 280 nm using calculated extinction coefficient or by SDS PAGE quantification using bovine serum albumin (BSA) as a standard (Figure S5).

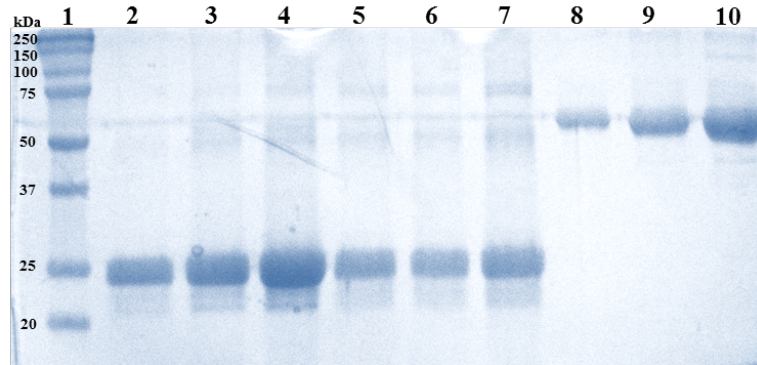

**Figure S5.** SDS PAGE quantification of purified wt MsrA and F52L MsrA: (1) protein mass marker; (2) 2  $\mu$ L of F52L MsrA; (3) 4  $\mu$ L of F52L MsrA; (4) 8  $\mu$ L of F52L MsrA; (5) and (6) 5  $\mu$ L of wt MsrA; (7) 8  $\mu$ L of wt MsrA; (8) 2  $\mu$ g of BSA; (9) 4  $\mu$ g of BSA; (10) 8  $\mu$ g of BSA.

## 8. Preparation of a Library and Screening

*MsrA* in pET-16b vector was used as the template for error-prone PCR using standard conditions of GeneMorph II EZ Clone Domain Mutagenesis Kit (Agilent Technologies) and a set of primers (5'-GCGGCCATATCGAAGGTC and 5'-CGGGCTTTGTTAGCAGCC). Error-prone PCR was carried out using GeneMorph II enzymes and the following cycling protocol: 1  $\times$  (95  $^{\circ}$ C, 2 min.), 30  $\times$  (95  $^{\circ}$ C, 1 min.; 60  $^{\circ}$ C, 1 min.; 72  $^{\circ}$ C, 1 min.), 1  $\times$  (72  $^{\circ}$ C, 10 min). PCR product (megaprimers) was purified on agarose gel and used for the cloning reaction using EZ Clone kit and *msrA* in pET-16b vector as a template. The resulting gene library in pET-16b vector was transformed into *E. coli* 5-alpha competent cells competent cells via electroporation, plated on LB agar plates with ampicillin (100 mgL<sup>-1</sup>) and incubated overnight at 37  $^{\circ}$ C. Then, the plates with colonies were homogenously sprayed with the solution of Propyl GreenOx (10 mM in 10  $\times$  TBE) and incubated at room temperature for 10-30 min. Then, the plates were visually inspected under UV light (366 nm handlamp, 8W) and the glowing colonies were collected for further analysis.

Protein sequences of variants (mutations indicated in red)

wt-MsrA

MGHHHHHHHHHHSSGHIEGRHMSLFDK KHLVSPADALPGRNTPMPVATLHAVNGH  
SMTNVPDGM EIAIFAMGCFWGVRLFWQLPGVYSTAAGYTGGYT PNPTYREVCSGD  
TGHA EAVRIVYDPSVISYEQLLQVFWENH DPAQGM RQGNDHGTQYRS AIYPLTPEQD

AAARASLERFQAAMLAADDDRHITEIANATPFYYAEDDHQQYLHKNPYGYCGIGGI  
GVCLPPKA

clone1-MsrA

MGHHHHHHHHHHSSGHIEGRHMSLFDKKHLVSPADALPG<sup>C</sup>NTPMPVATLHAVNGH  
SMTNVDPDGMEIAIFAMGCL<sup>L</sup>WGVERLFWQLPGVYSTAAGYTGGYTPNPTYREVCSDG  
TGHAEA VRIVYDPSVISYE<sup>H</sup>LLQVFWENHDPAQGM RQGN DHGTQYRS AIYPLTPEQD  
AAARASLERFQAAMLAADDDRHITEIANATPFYYAEDDHQQYLHKNPYGYCGIGGI  
GVCLPPKA

clone2-MsrA

MGHHHHHHHHHHSSGHIEGRHMSLFDKKHLVSPADALPGRNTPMPVATLHAVNGH  
SMTNVDPDGMEIAIFAMGCL<sup>L</sup>WGVERLFWQLPGVYSTAAGYTGGYTPNPTYREVCSDG  
TGHAEA VRIVYDPSVIN<sup>N</sup>YEQLLQVFWENHDPAQGM RQGN DHGTQYRS AIYPLTPEQ  
DAAARASLERF<sup>V</sup>AAMLAADDDRHITEIANATPFYYAEDDHQQYLHKNPYGYCGIG  
GIGVCLPPKA

## 9. Preparation of F52L single mutant of MsrA

The single mutation F52L was introduced to the wild type MsrA by Q5 Site-Directed Mutagenesis Kit (New England Biolabs) with *msrA* in pET-16b vector as a template and a set of primers (5'-GATGGGTTGT<sup>C</sup>TCTGGGGTGT and 5'-GCAAAAATGGCAATCTCCATTC). The procedure was carried out according to the manufacturer's protocol. The presence of the F52L mutation was confirmed by DNA sequencing analysis.

## 10. MsrA Activity Assay

Purified wild type and mutant MsrA were used in the assay. To a solution of Propyl GreenOx (100  $\mu$ M Propyl GreenOx and 2 mM DTT in 1  $\times$  TBE, 90  $\mu$ l) in a cuvette 10  $\mu$ l of the enzyme (15 mg/mL) was added and absorbance at 400 nm was measured over the period of 30 min (Figure S6).

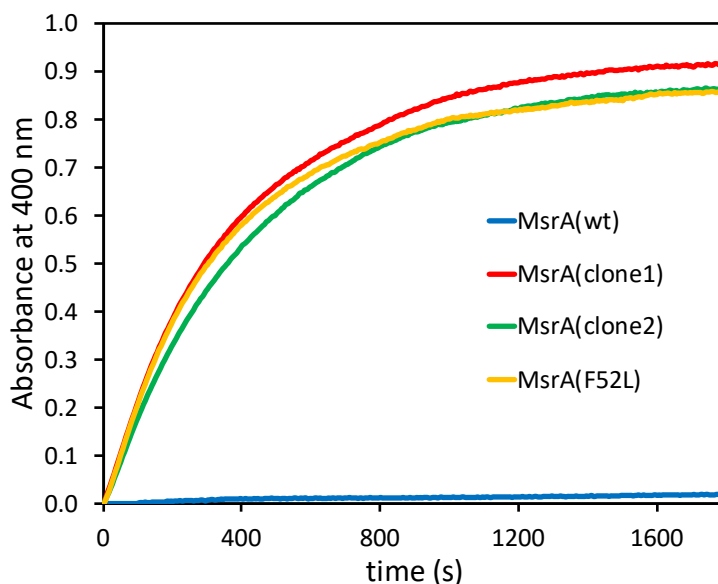

**Figure S6.** Kinetics of reduction of Propyl GreenOx (100  $\mu$ M) catalyzed by wt MsrA and its three mutants measured by the change of absorbance at 400 nm.

## 11. General Procedure for the Kinetic Resolution of Racemic Sulfoxides with Wild Type and F52L MsrA

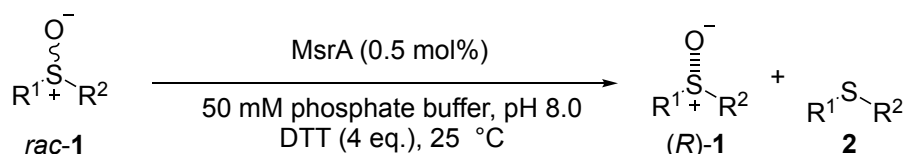

A 1.5mL Eppendorf tube was charged with individual solutions of phosphate buffer (214  $\mu$ L, 50mM  $\text{Na}_2\text{HPO}_4/\text{NaH}_2\text{PO}_4$ , 50mM NaCl, pH = 8) and DTT (250  $\mu$ L of 52 mM, 4 equivs., 26 mM final concentration) in phosphate buffer and a racemic sulfoxide (10  $\mu$ L of 324 mM, 3.2  $\mu$ mol, 6.5 mM final concentration) in  $\text{CH}_3\text{CN}$ . The reaction was initiated by the addition of MsrA (25.6  $\mu$ L of 635  $\mu$ M, 0.5 mol%, 32.5  $\mu$ M final concentration) in Tris buffer (50 mM Tris-HCl buffer, pH 8.0). The reaction mixture was flushed with argon and incubated at 25  $^\circ\text{C}$ . The conversion of the reaction was determined by analytical HPLC. After 24 h, the reaction mixture was extracted with EtOAc (4 mL), washed with water (0.5 mL), brine (0.5 mL), dried over

MgSO<sub>4</sub> and concentrated by rotary evaporation under reduced pressure. The enantiomeric excess of the crude product was determined by chiral HPLC.

**(R)-1-Methyl-4-(methylsulfinyl)benzene (1a)<sup>1</sup>**

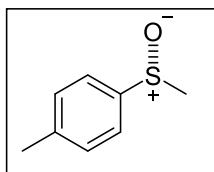

C<sub>8</sub>H<sub>10</sub>OS (154.23 g/mol), wt MsrA: conversion 50 %, *ee* > 99 %, *s* > 100; F52L MsrA: conversion 50 %, *ee* > 99 %, *s* > 100. The enantiomeric excess (*ee*) was determined by HPLC (ODH chiralcel: heptane/propan-2-ol (98:2); flow rate 1 mL/min; 25 °C; 254 nm; *t<sub>r</sub>* = 31.3 and 34.1 min).

**(R)-1-(Ethylsulfinyl)-4-methylbenzene (1b)<sup>1</sup>**

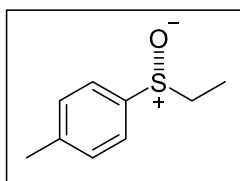

C<sub>9</sub>H<sub>12</sub>OS (168.25 g/mol), wt MsrA: conversion 50 %, *ee* > 99 %, *s* > 100; F52L MsrA: conversion 50 %, *ee* > 99 %, *s* > 100. The enantiomeric excess (*ee*) was determined by HPLC (IA chiralpak: heptane/propan-2-ol (95:5); flow rate 1 mL/min; 25 °C; 254 nm; *t<sub>r</sub>* = 16.4 and 17.9 min).

**(R)-1-(Propylsulfinyl)-4-methylbenzene (1c)<sup>1</sup>**

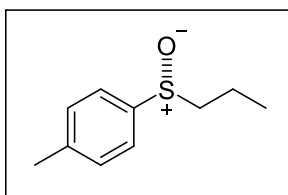

C<sub>10</sub>H<sub>14</sub>OS (182.28 g/mol), wt MsrA: conversion <3 %, *ee* = 3 %, *s* not determined; F52L MsrA: conversion 50 %, *ee* = 99 %, *s* > 100. The enantiomeric excess (*ee*) was determined by HPLC (IA chiralpak: heptane/propan-2-ol (95:5); flow rate 1 mL/min; 25 °C; 254 nm; *t<sub>r</sub>* = 14.7 and 16.0 min).

**(R)-1-(butylsulfinyl)-4-methylbenzene (1d)<sup>9</sup>**

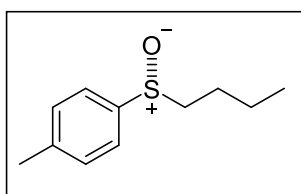

C<sub>11</sub>H<sub>16</sub>OS (196.31 g/mol), wt MsrA: conversion <3 %, *ee* = 0 %, *s* = not determined; F52L MsrA: conversion 50 %, *ee* > 99 %, *s* > 100. The enantiomeric excess (*ee*) was determined by HPLC (IA chiralpak: heptane/propan-2-ol (95:5); flow rate 1 mL/min; 25 °C; 254 nm; *t<sub>r</sub>* = 14.2 and 15.5 min).

**(R)-2-(2-(butylsulfinyl)ethyl)benzene (1e)<sup>10</sup>**

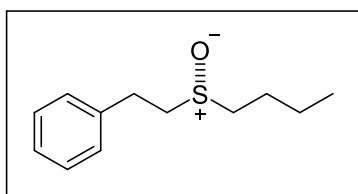

C<sub>12</sub>H<sub>18</sub>OS (210.34 g/mol), wt MsrA: conversion <3 %, *ee* = 0 %, *s* not determined; F52L MsrA: conversion 50 %, *ee* > 99 %, *s* > 100. The enantiomeric excess (*ee*) was determined by HPLC (IA chiralpak: heptane/propan-2-ol (95:5); flow rate 1 mL/min; 25 °C; 220 nm; *t<sub>r</sub>* = 17.1 and 23.0 min).

### 1-(Isopropylsulfinyl)-4-methylbenzene (1f)<sup>2</sup>

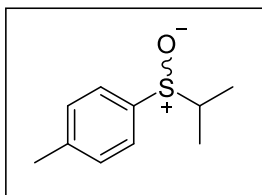

$C_{10}H_{14}OS$  (182.28 g/mol), wt MsrA: conversion <3 %,  $ee = 0$  %,  $s$  not determined; F52L MsrA: conversion <3 %,  $ee = 0$  %,  $s$  not determined; The enantiomeric excess ( $ee$ ) was determined by HPLC (IA chiralpak: heptane/propan-2-ol (95:5); flow rate 1 mL/min; 25 °C; 254 nm;  $t_r = 13.8$  and 15.1 min).

### Albendazole-(*R*)-sulfoxide (1g)<sup>11</sup>

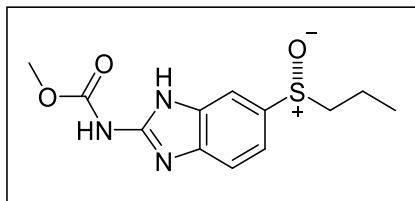

$C_{12}H_{15}N_3O_3S$  (281.33 g/mol), stock solution was prepared in *N*-methyl-2-pyrrolidone instead of  $CH_3CN$  and 1.2 mol% of MsrA at 37 °C was used, wt MsrA : conversion = 6 %,  $ee = 6$  %,  $s$  not determined; F52L MsrA: conversion = 49 %,  $ee = 94$  %,  $s > 100$ . The enantiomeric excess ( $ee$ ) was determined by HPLC (IC chiralpak: heptane/propan-2-ol (70:30); flow rate 1 mL/min; 25 °C; 294 nm;  $t_r = 24.5$  and 31.4 min).

## 12. References

- 1 V. Nosek and J. Míšek, *Angew. Chem. Int. Ed.*, 2018, **57**, 9849–9852.
- 2 V. Nosek and J. Míšek, *Chem. Commun.*, 2019, **55**, 10480–10483.
- 3 H. B. Kagan and J. C. Fiaud, in *Topics in Stereochemistry*, John Wiley & Sons, Ltd, 2007, pp. 249–330.
- 4 Y. Liu, J. Kim, H. Seo, S. Park and J. Chae, *Adv. Synth. Catal.*, 2015, **357**, 2205–2212.
- 5 G. Hu, J. Xu and P. Li, *Org. Biomol. Chem.*, 2018, **16**, 4151–4158.
- 6 A. S. Brown, L.-M. Bernal, T. L. Micotto, E. L. Smith and J. N. Wilson, *Org. Biomol. Chem.*, 2011, **9**, 2142–2148.
- 7 A. M. Brouwer, *Pure Appl. Chem.*, 2011, **83**, 2213–2228.
- 8 N. Brot, M. Atiour Rahman, J. Moskovitz and H. Weissbach, in *Methods in Enzymology*, Academic Press, 1995, vol. 251, pp. 462–470.
- 9 P. Gogoi, T. Kotipalli, K. Indukuri, S. Bondalapati, P. Saha and A. K. Saikia, *Tetrahedron Lett.*, 2012, **53**, 2726–2729.
- 10 A. Guerrero-Corella, A. M. Martinez-Gualda, F. Ahmadi, E. Ming, A. Fraile and J. Alemán, *Chem. Commun.*, 2017, **53**, 10463–10466.
- 11 W. Dai, G. Li, L. Wang, B. Chen, S. Shang, Y. Lv and S. Gao, *RSC Adv.*, 2014, **4**, 46545–46554.

### 13. HPLC Traces: Kinetic Resolution with MsrA (WT and F52L)

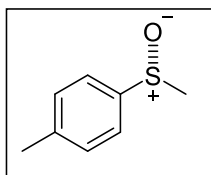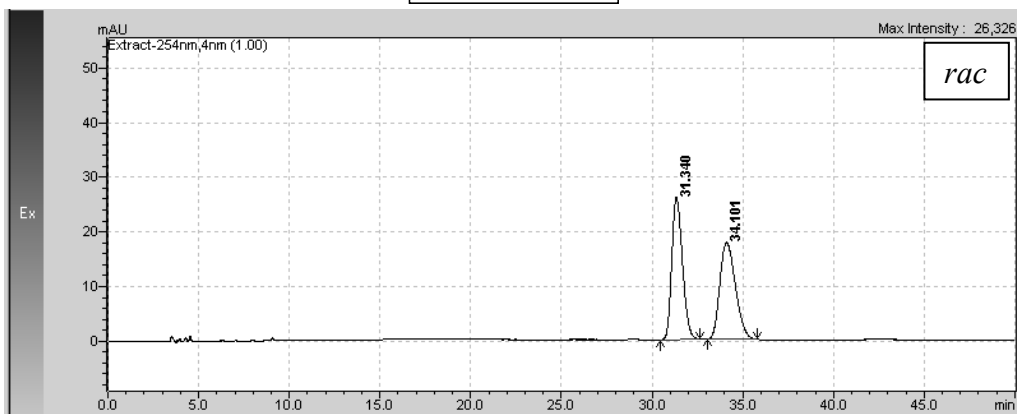

| Peak# | ID# | Ret. Time | Conc.    | Area    | Height | Peak Start | Peak End | Area%   |
|-------|-----|-----------|----------|---------|--------|------------|----------|---------|
| 1     |     | 31.340    | 50.07008 | 1063959 | 26056  | 30.485     | 32.651   | 50.0701 |
| 2     |     | 34.101    | 49.92992 | 1060981 | 17749  | 33.035     | 35.829   | 49.9299 |

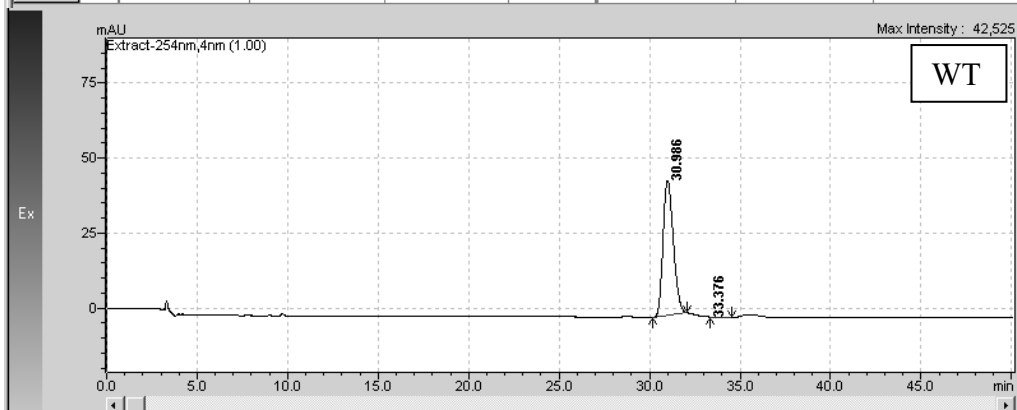

| Peak# | ID# | Ret. Time | Conc.    | Area    | Height | Peak Start | Peak End | Area%   |
|-------|-----|-----------|----------|---------|--------|------------|----------|---------|
| 1     |     | 30.986    | 99.77246 | 1783397 | 44938  | 30.155     | 32.053   | 99.7725 |
| 2     |     | 33.376    | 0.22754  | 4067    | 178    | 33.385     | 34.539   | 0.2275  |

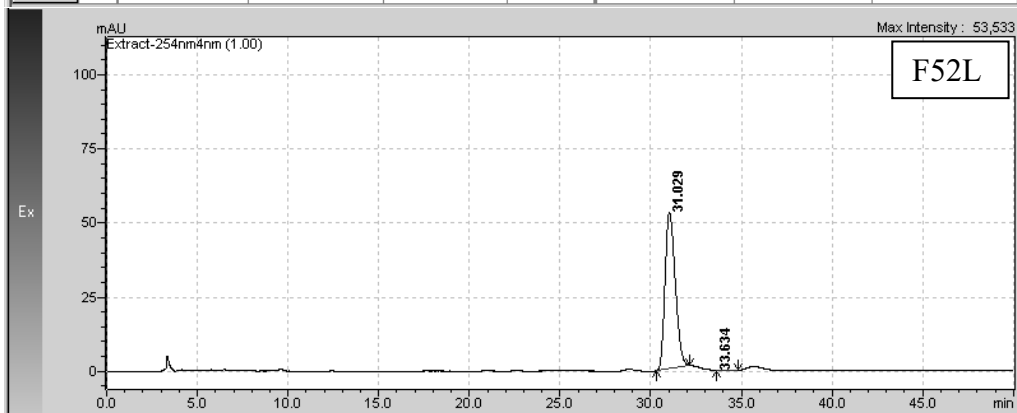

| Peak# | ID# | Ret. Time | Conc.    | Area    | Height | Peak Start | Peak End | Area%   |
|-------|-----|-----------|----------|---------|--------|------------|----------|---------|
| 1     |     | 31.029    | 99.83648 | 2062672 | 52578  | 30.315     | 32.149   | 99.8365 |
| 2     |     | 33.634    | 0.16352  | 3378    | 137    | 33.632     | 34.805   | 0.1635  |

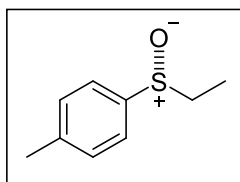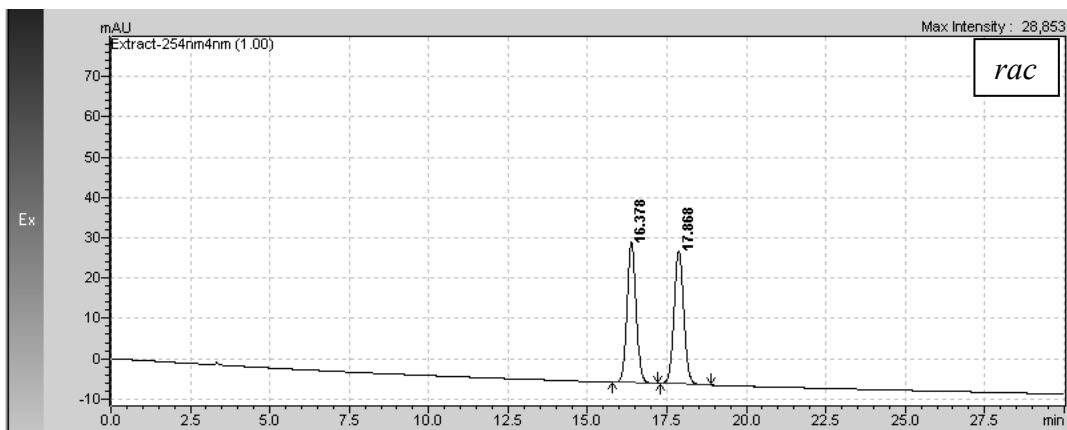

| Peak# | ID# | Ret. Time | Conc.    | Area   | Height | Peak Start | Peak End | Area%   |
|-------|-----|-----------|----------|--------|--------|------------|----------|---------|
| 1     |     | 16.378    | 50.02220 | 697034 | 34843  | 15.797     | 17.195   | 50.0222 |
| 2     |     | 17.868    | 49.97780 | 696415 | 32947  | 17.280     | 18.880   | 49.9778 |

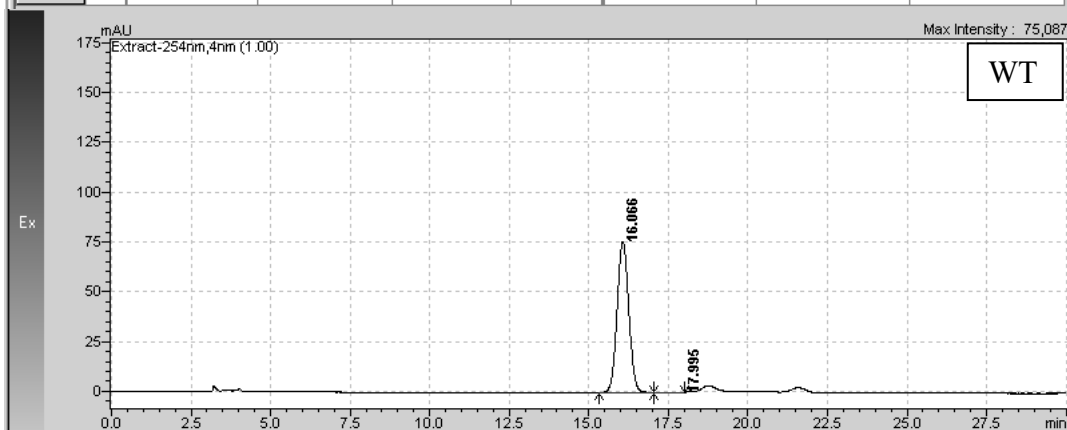

| Peak# | ID# | Ret. Time | Conc.    | Area    | Height | Peak Start | Peak End | Area%   |
|-------|-----|-----------|----------|---------|--------|------------|----------|---------|
| 1     |     | 16.066    | 99.91349 | 1944906 | 75741  | 15.339     | 17.045   | 99.9135 |
| 2     |     | 17.995    | 0.08651  | 1684    | 44     | 17.045     | 18.005   | 0.0865  |

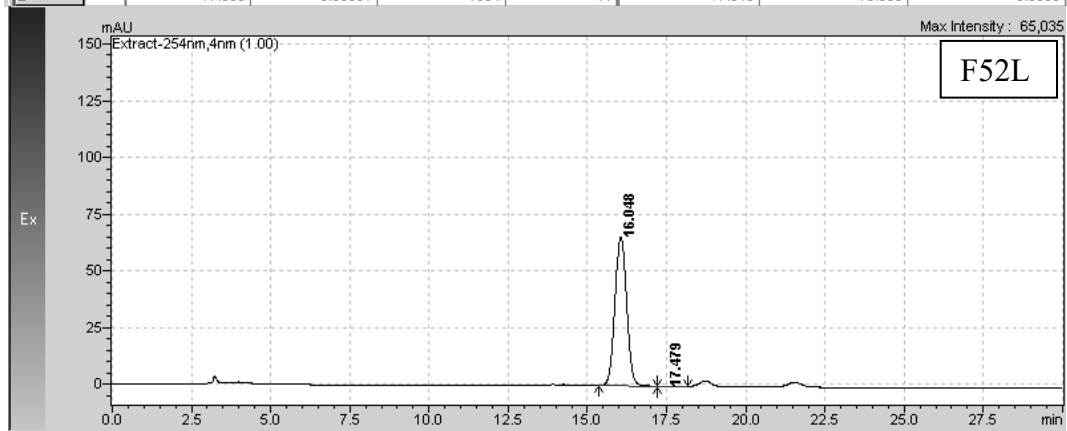

| Peak# | ID# | Ret. Time | Conc.    | Area    | Height | Peak Start | Peak End | Area%   |
|-------|-----|-----------|----------|---------|--------|------------|----------|---------|
| 1     |     | 16.048    | 99.93190 | 1676830 | 65501  | 15.371     | 17.195   | 99.9319 |
| 2     |     | 17.479    | 0.06810  | 1143    | 76     | 17.205     | 18.165   | 0.0681  |



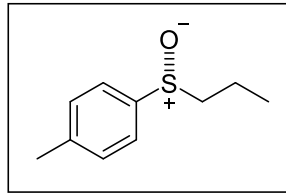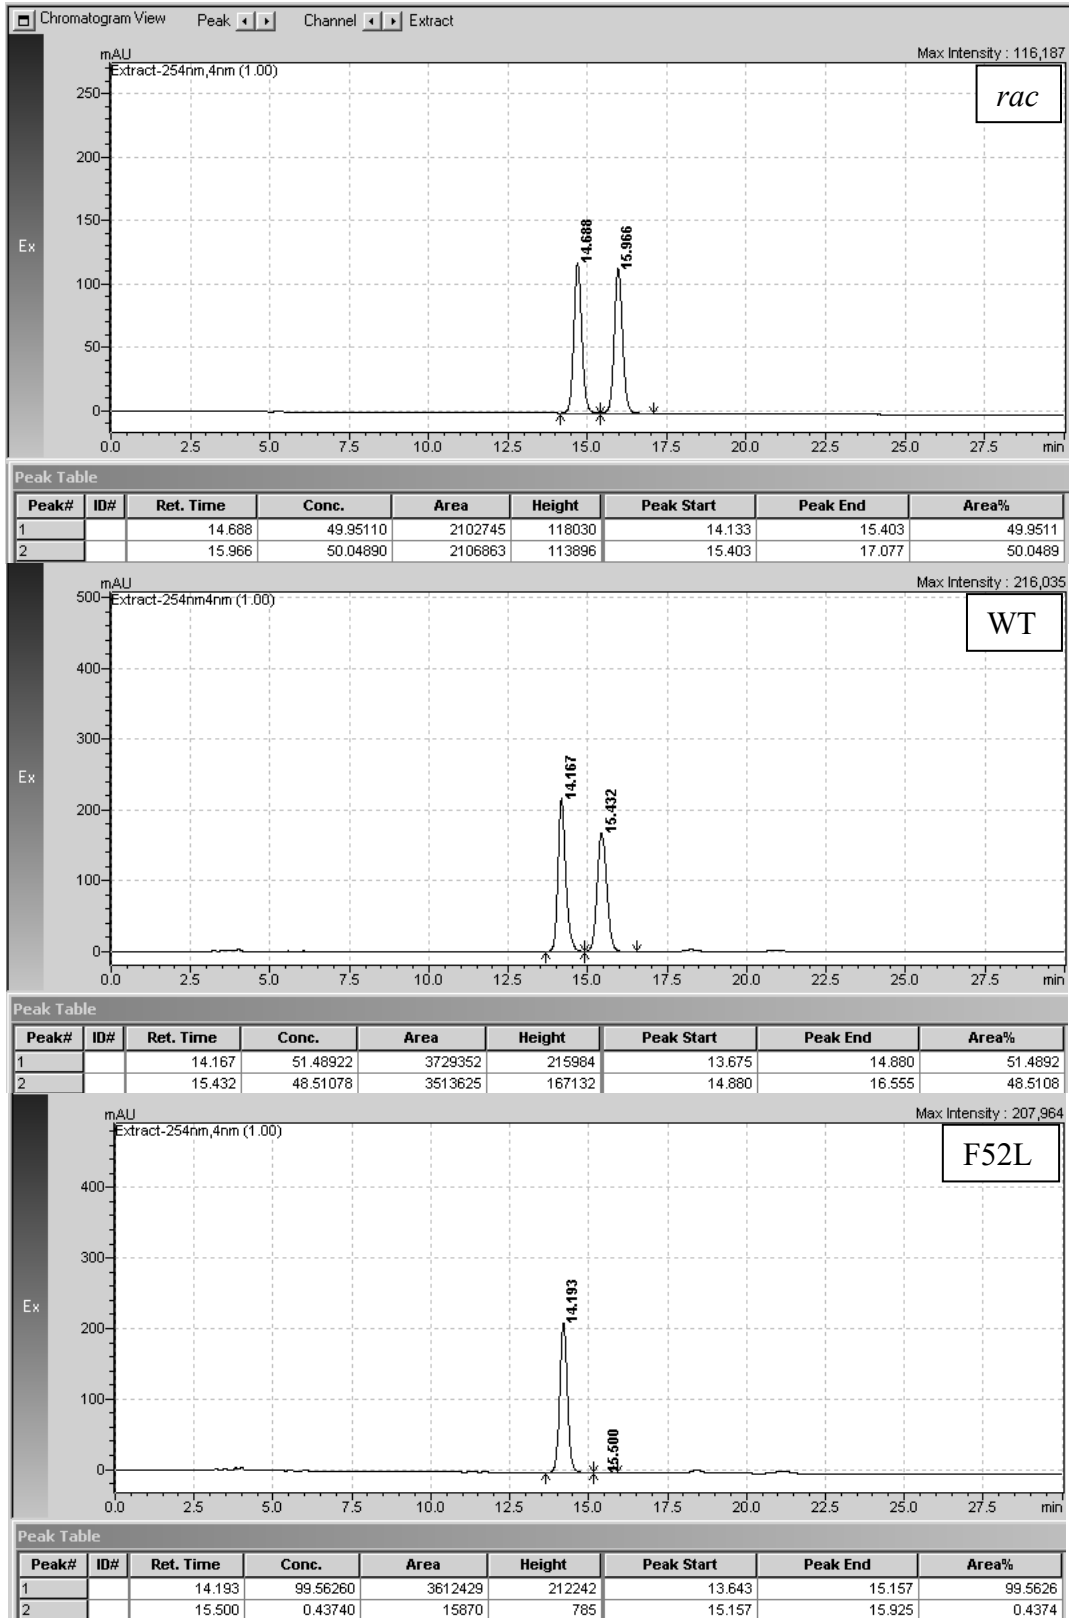

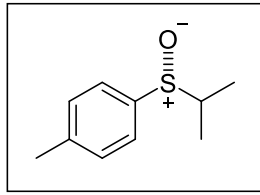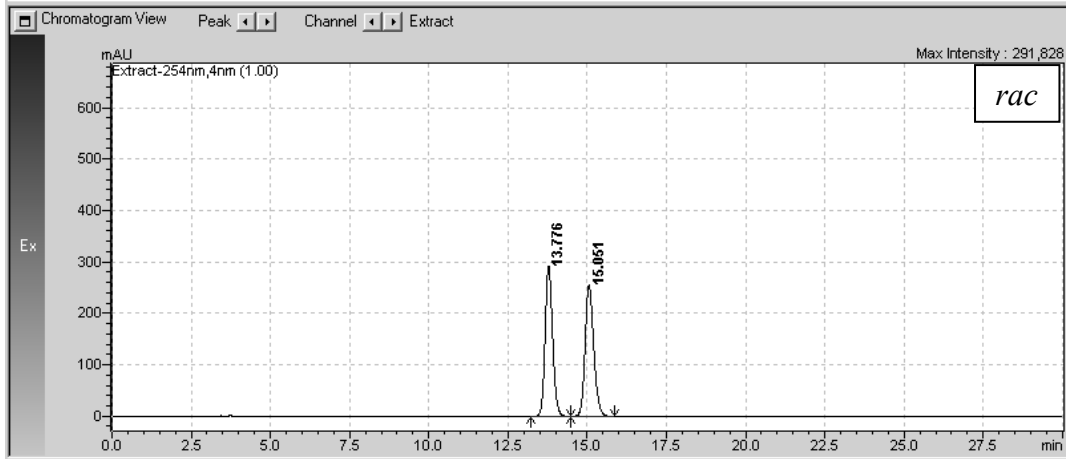

| Peak# | ID# | Ret. Time | Conc.    | Area    | Height | Peak Start | Peak End | Area%   |
|-------|-----|-----------|----------|---------|--------|------------|----------|---------|
| 1     |     | 13.776    | 50.02701 | 4901629 | 292600 | 13.216     | 14.485   | 50.0270 |
| 2     |     | 15.051    | 49.97299 | 4896336 | 254998 | 14.485     | 15.851   | 49.9730 |

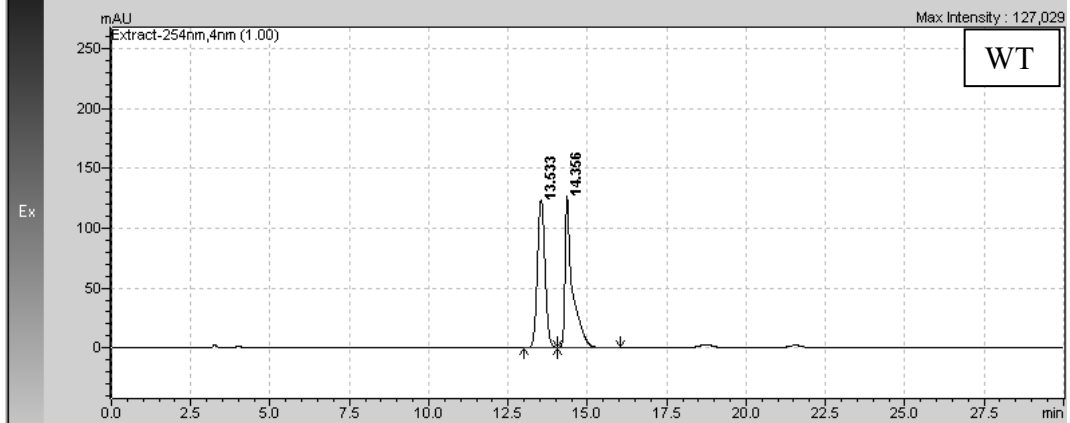

| Peak# | ID# | Ret. Time | Conc.    | Area    | Height | Peak Start | Peak End | Area%   |
|-------|-----|-----------|----------|---------|--------|------------|----------|---------|
| 1     |     | 13.533    | 49.75055 | 2025811 | 123866 | 12.981     | 14.059   | 49.7505 |
| 2     |     | 14.356    | 50.24945 | 2046126 | 127021 | 14.059     | 16.053   | 50.2495 |

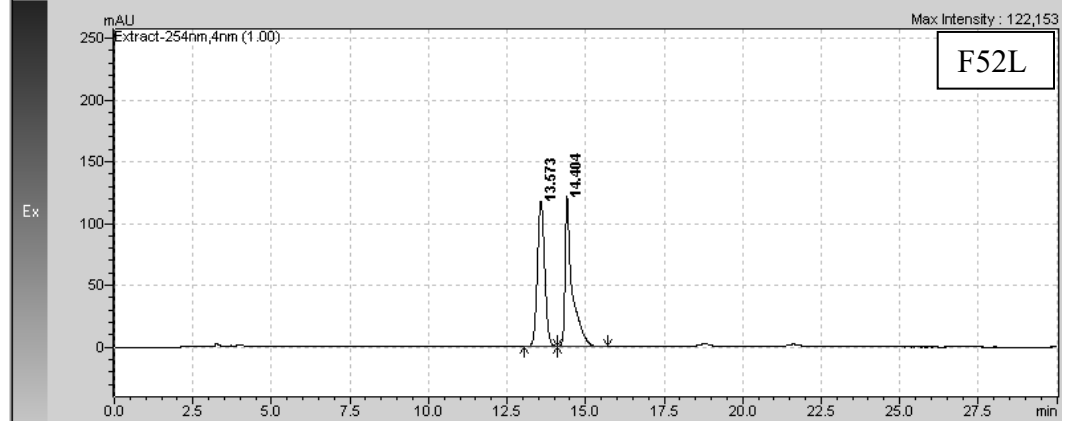

| Peak# | ID# | Ret. Time | Conc.    | Area    | Height | Peak Start | Peak End | Area%   |
|-------|-----|-----------|----------|---------|--------|------------|----------|---------|
| 1     |     | 13.573    | 50.21553 | 1935858 | 117904 | 13.035     | 14.101   | 50.2155 |
| 2     |     | 14.404    | 49.78447 | 1919240 | 121817 | 14.101     | 15.701   | 49.7845 |

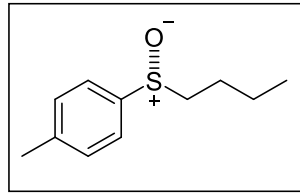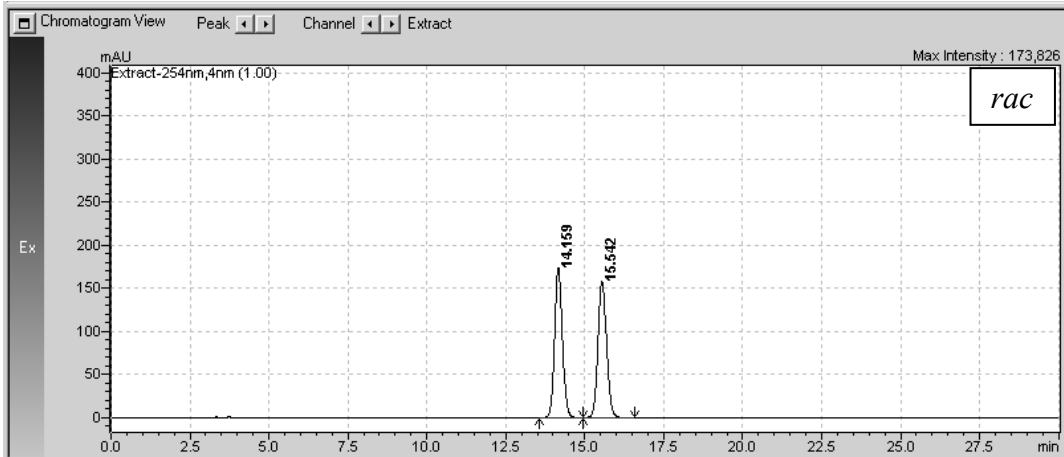

Peak Table

| Peak# | ID# | Ret. Time | Conc.    | Area    | Height | Peak Start | Peak End | Area%   |
|-------|-----|-----------|----------|---------|--------|------------|----------|---------|
| 1     |     | 14.159    | 49.99147 | 3015231 | 174373 | 13.568     | 14.965   | 49.9915 |
| 2     |     | 15.542    | 50.00853 | 3016260 | 158343 | 14.965     | 16.576   | 50.0085 |

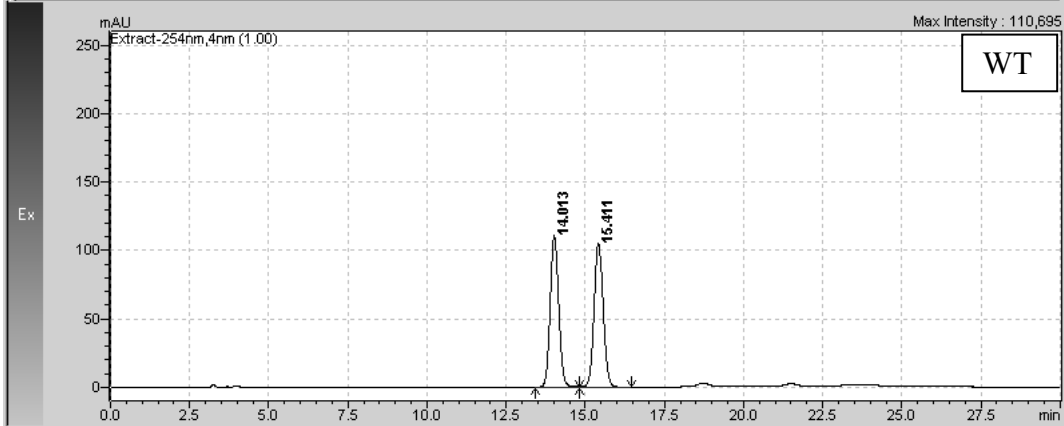

Peak Table

| Peak# | ID# | Ret. Time | Conc.    | Area    | Height | Peak Start | Peak End | Area%   |
|-------|-----|-----------|----------|---------|--------|------------|----------|---------|
| 1     |     | 14.013    | 50.05404 | 2105439 | 110773 | 13.440     | 14.816   | 50.0540 |
| 2     |     | 15.411    | 49.94596 | 2100893 | 105435 | 14.816     | 16.448   | 49.9460 |

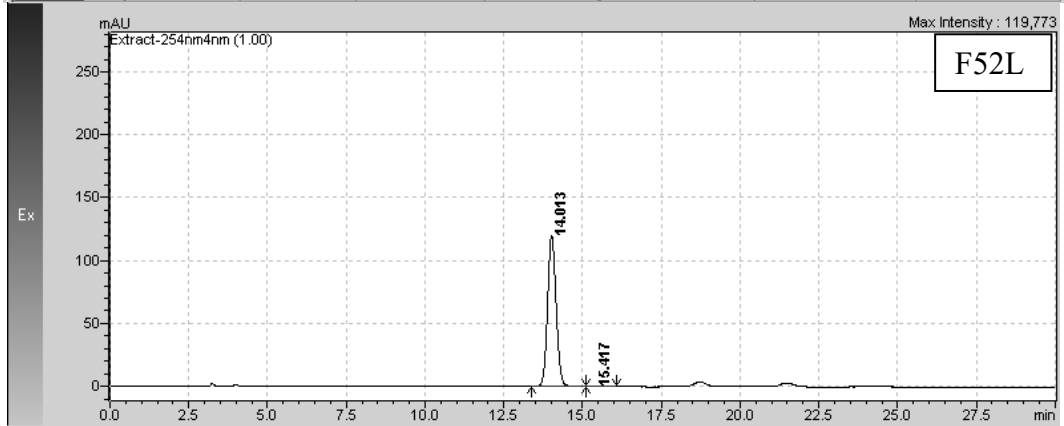

Peak Table

| Peak# | ID# | Ret. Time | Conc.    | Area    | Height | Peak Start | Peak End | Area%   |
|-------|-----|-----------|----------|---------|--------|------------|----------|---------|
| 1     |     | 14.013    | 99.86996 | 2285685 | 119966 | 13.397     | 15.104   | 99.8700 |
| 2     |     | 15.417    | 0.13004  | 2976    | 186    | 15.115     | 16.075   | 0.1300  |

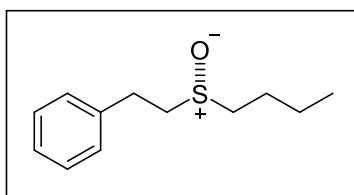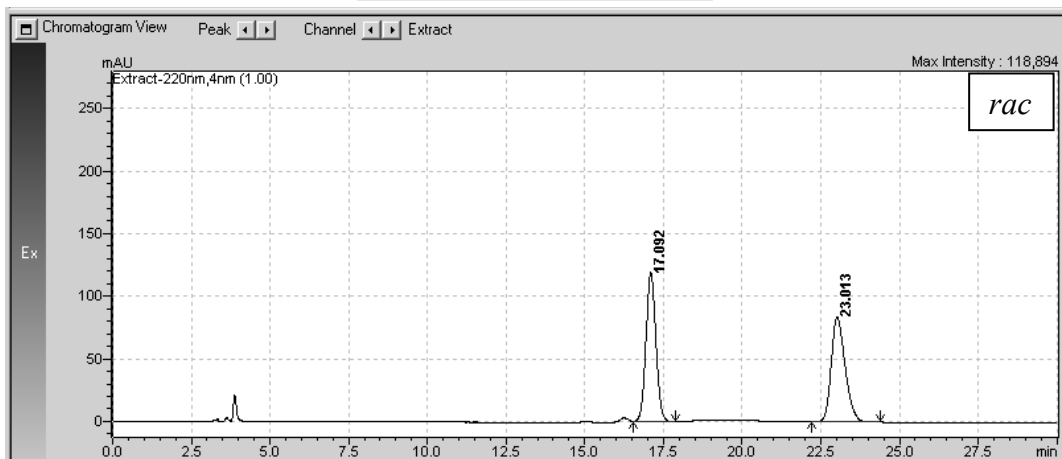

Peak Table

| Peak# | ID# | Ret. Time | Conc.    | Area    | Height | Peak Start | Peak End | Area%   |
|-------|-----|-----------|----------|---------|--------|------------|----------|---------|
| 1     |     | 17.092    | 50.27525 | 2617798 | 119151 | 16.544     | 17.867   | 50.2752 |
| 2     |     | 23.013    | 49.72475 | 2589134 | 83983  | 22.219     | 24.373   | 49.7248 |

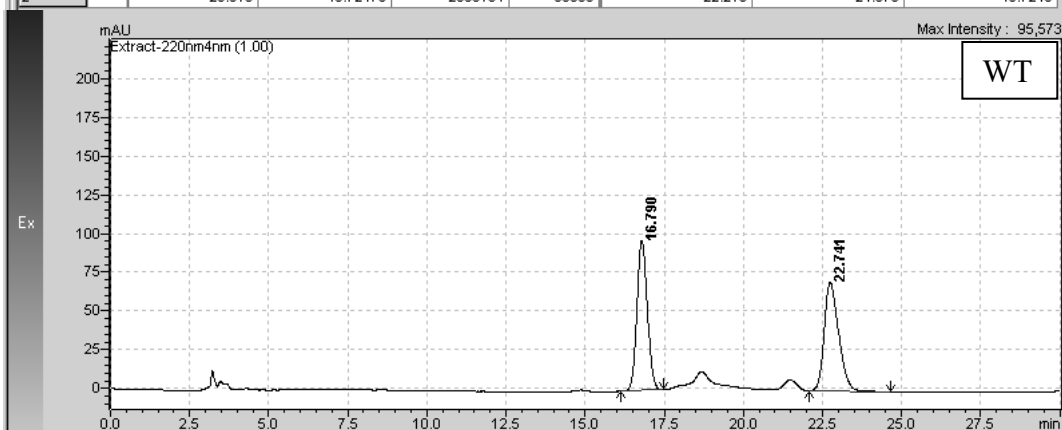

Peak Table

| Peak# | ID# | Ret. Time | Conc.    | Area    | Height | Peak Start | Peak End | Area%   |
|-------|-----|-----------|----------|---------|--------|------------|----------|---------|
| 1     |     | 16.790    | 49.93502 | 2221104 | 96904  | 16.139     | 17.472   | 49.9350 |
| 2     |     | 22.741    | 50.06498 | 2226884 | 69832  | 22.069     | 24.672   | 50.0650 |

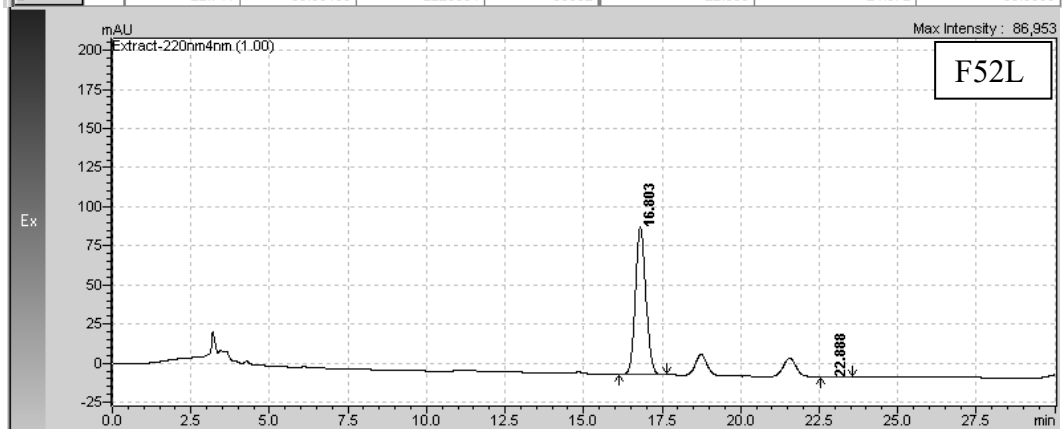

Peak Table

| Peak# | ID# | Ret. Time | Conc.    | Area    | Height | Peak Start | Peak End | Area%   |
|-------|-----|-----------|----------|---------|--------|------------|----------|---------|
| 1     |     | 16.803    | 99.68400 | 2186712 | 94322  | 16.128     | 17.664   | 99.6840 |
| 2     |     | 22.888    | 0.31600  | 6932    | 280    | 22.528     | 23.552   | 0.3160  |

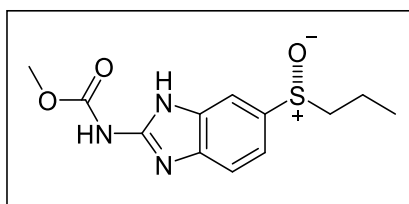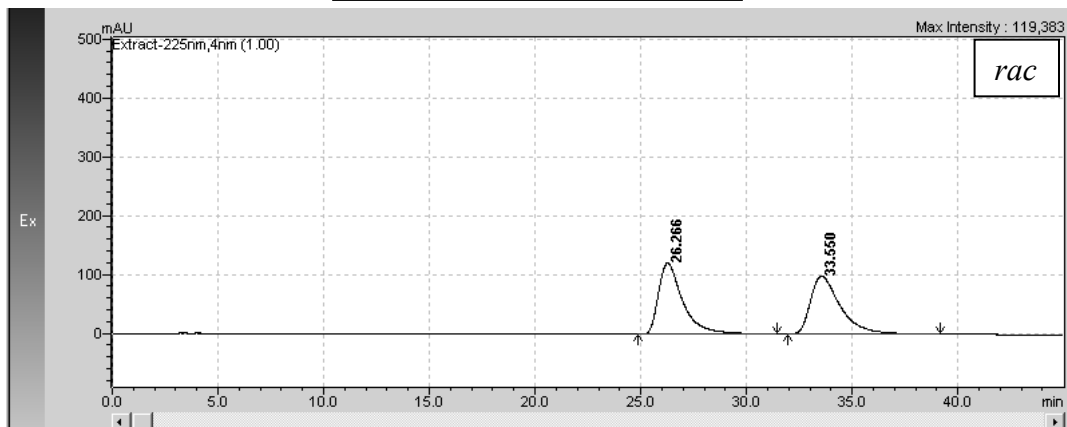

| Peak# | ID# | Ret. Time | Conc.    | Area    | Height | Peak Start | Peak End | Area%   |
|-------|-----|-----------|----------|---------|--------|------------|----------|---------|
| 1     |     | 26.266    | 50.18346 | 9782597 | 121181 | 24.875     | 31.424   | 50.1835 |
| 2     |     | 33.550    | 49.81654 | 9711072 | 98108  | 31.957     | 39.136   | 49.8165 |

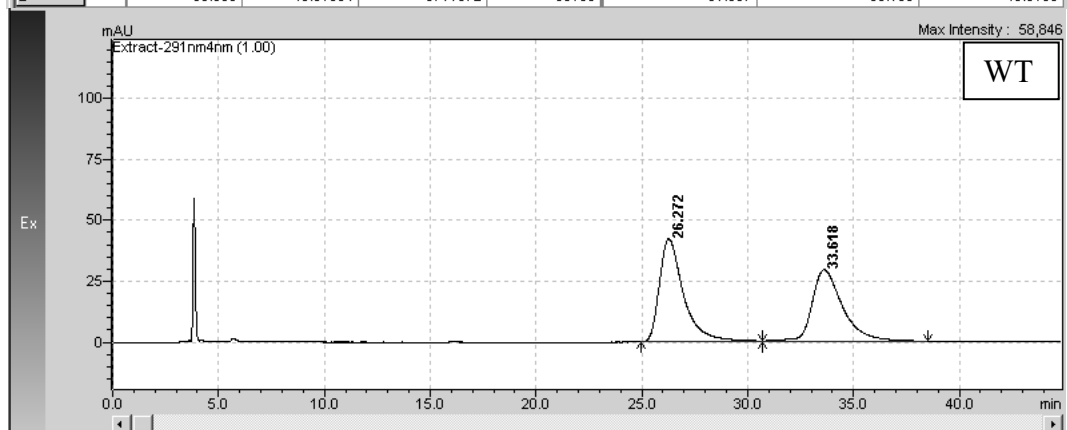

| Peak# | ID# | Ret. Time | Conc.    | Area    | Height | Peak Start | Peak End | Area%   |
|-------|-----|-----------|----------|---------|--------|------------|----------|---------|
| 1     |     | 26.272    | 52.98070 | 3391019 | 42245  | 24.949     | 30.677   | 52.9807 |
| 2     |     | 33.618    | 47.01930 | 3009460 | 29475  | 30.677     | 38.485   | 47.0193 |

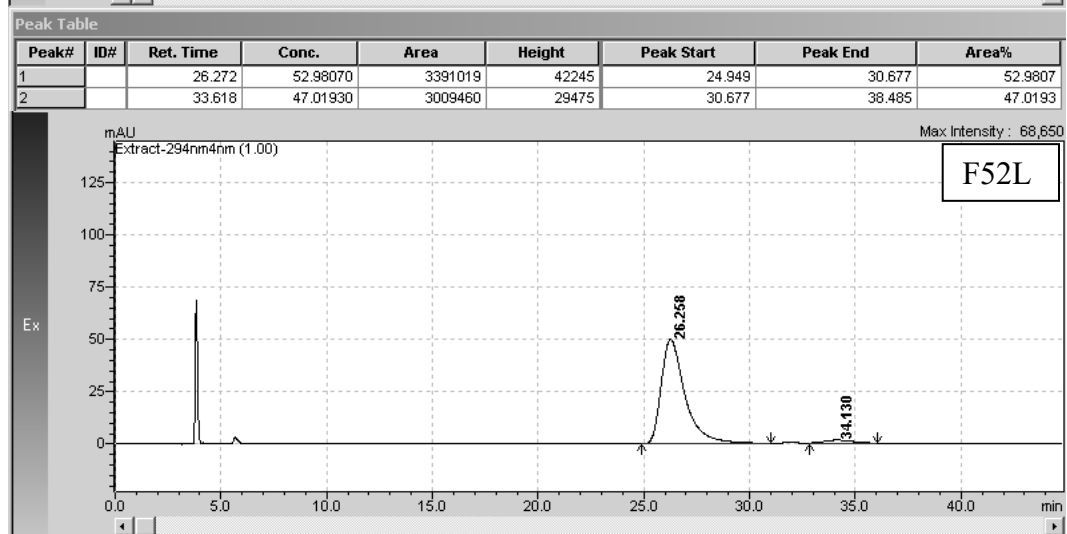

| Peak# | ID# | Ret. Time | Conc.    | Area    | Height | Peak Start | Peak End | Area%   |
|-------|-----|-----------|----------|---------|--------|------------|----------|---------|
| 1     |     | 26.258    | 96.74304 | 3904835 | 49982  | 24.917     | 30.997   | 96.7430 |
| 2     |     | 34.130    | 3.25696  | 131460  | 1447   | 32.832     | 36.053   | 3.2570  |

## 14. NMR Spectra

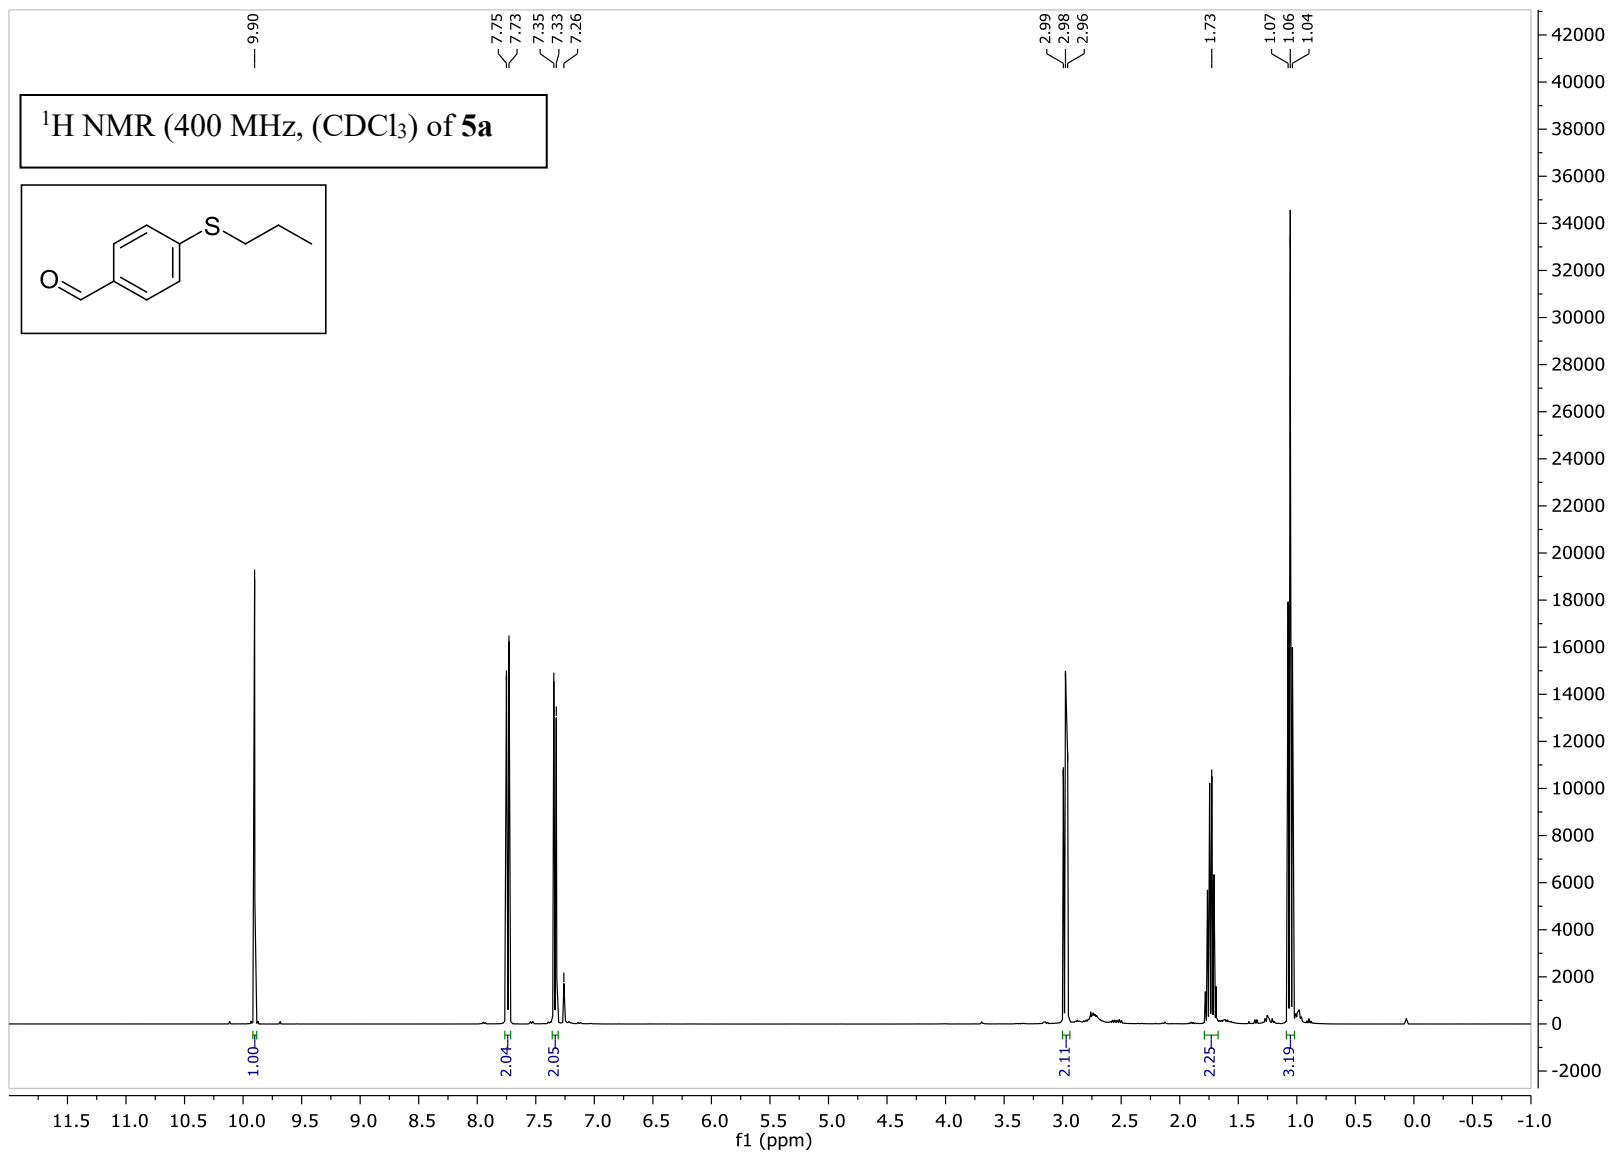

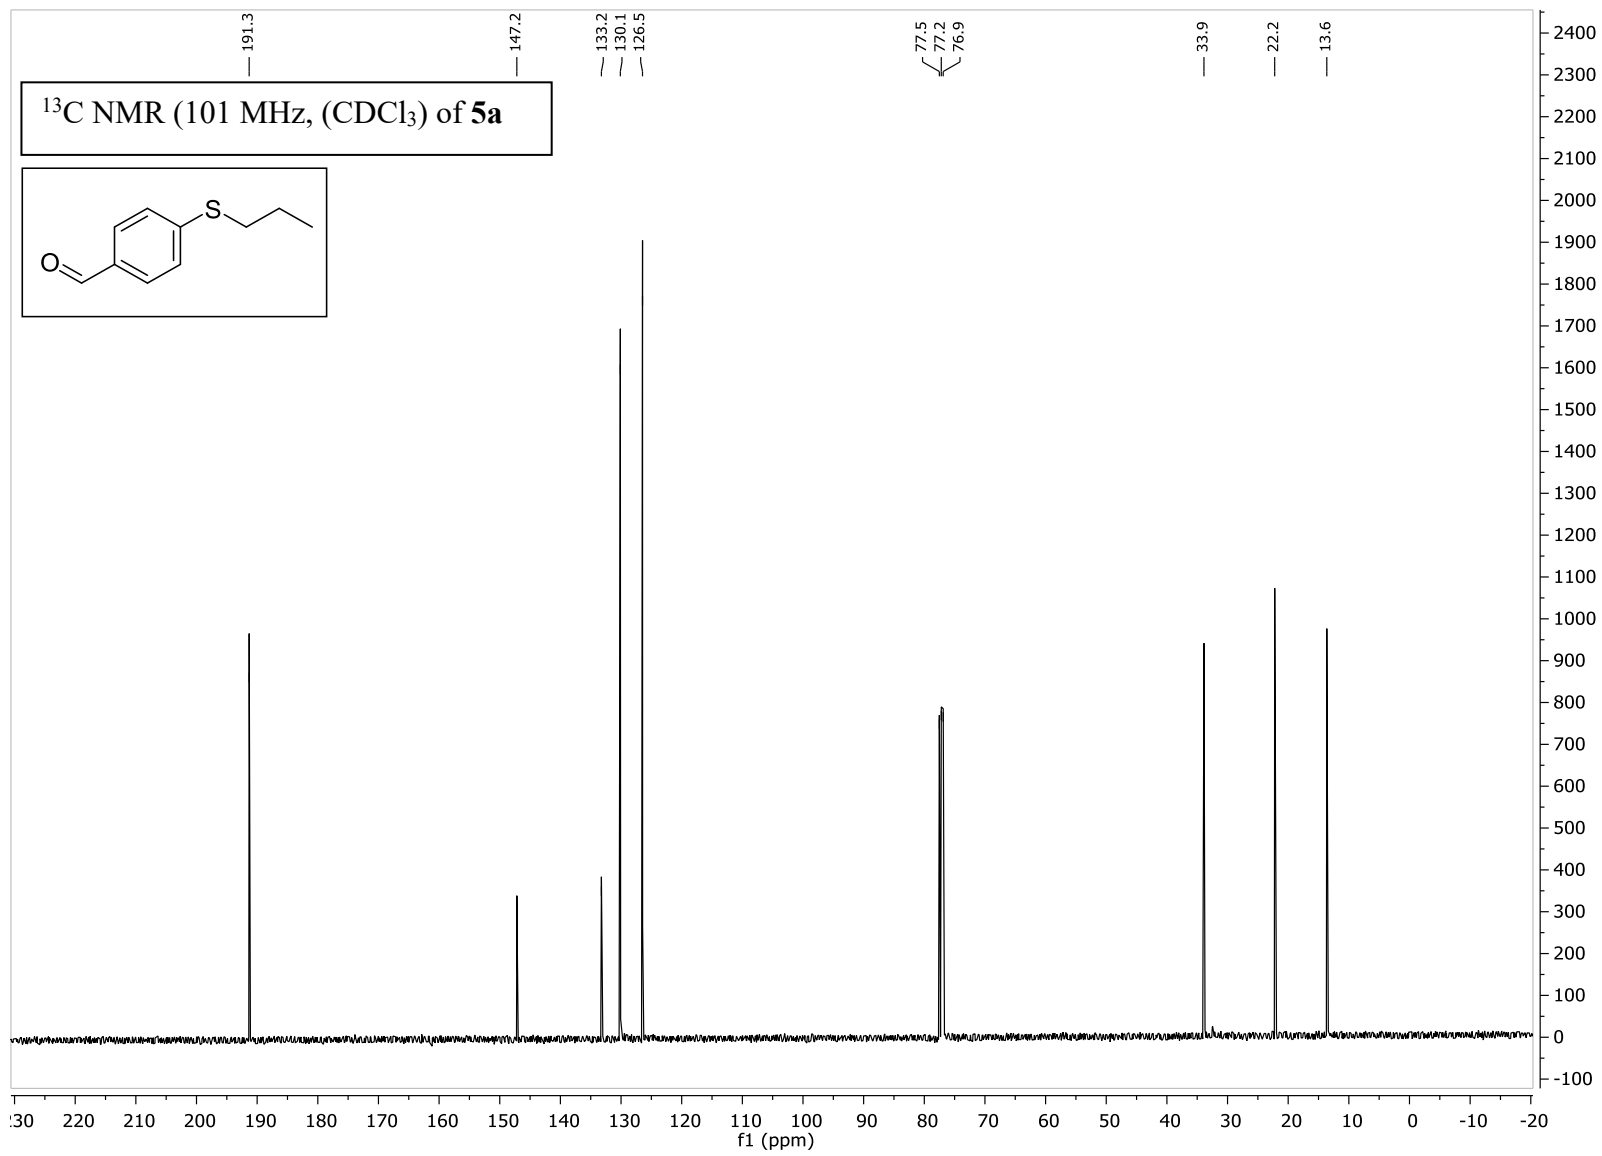



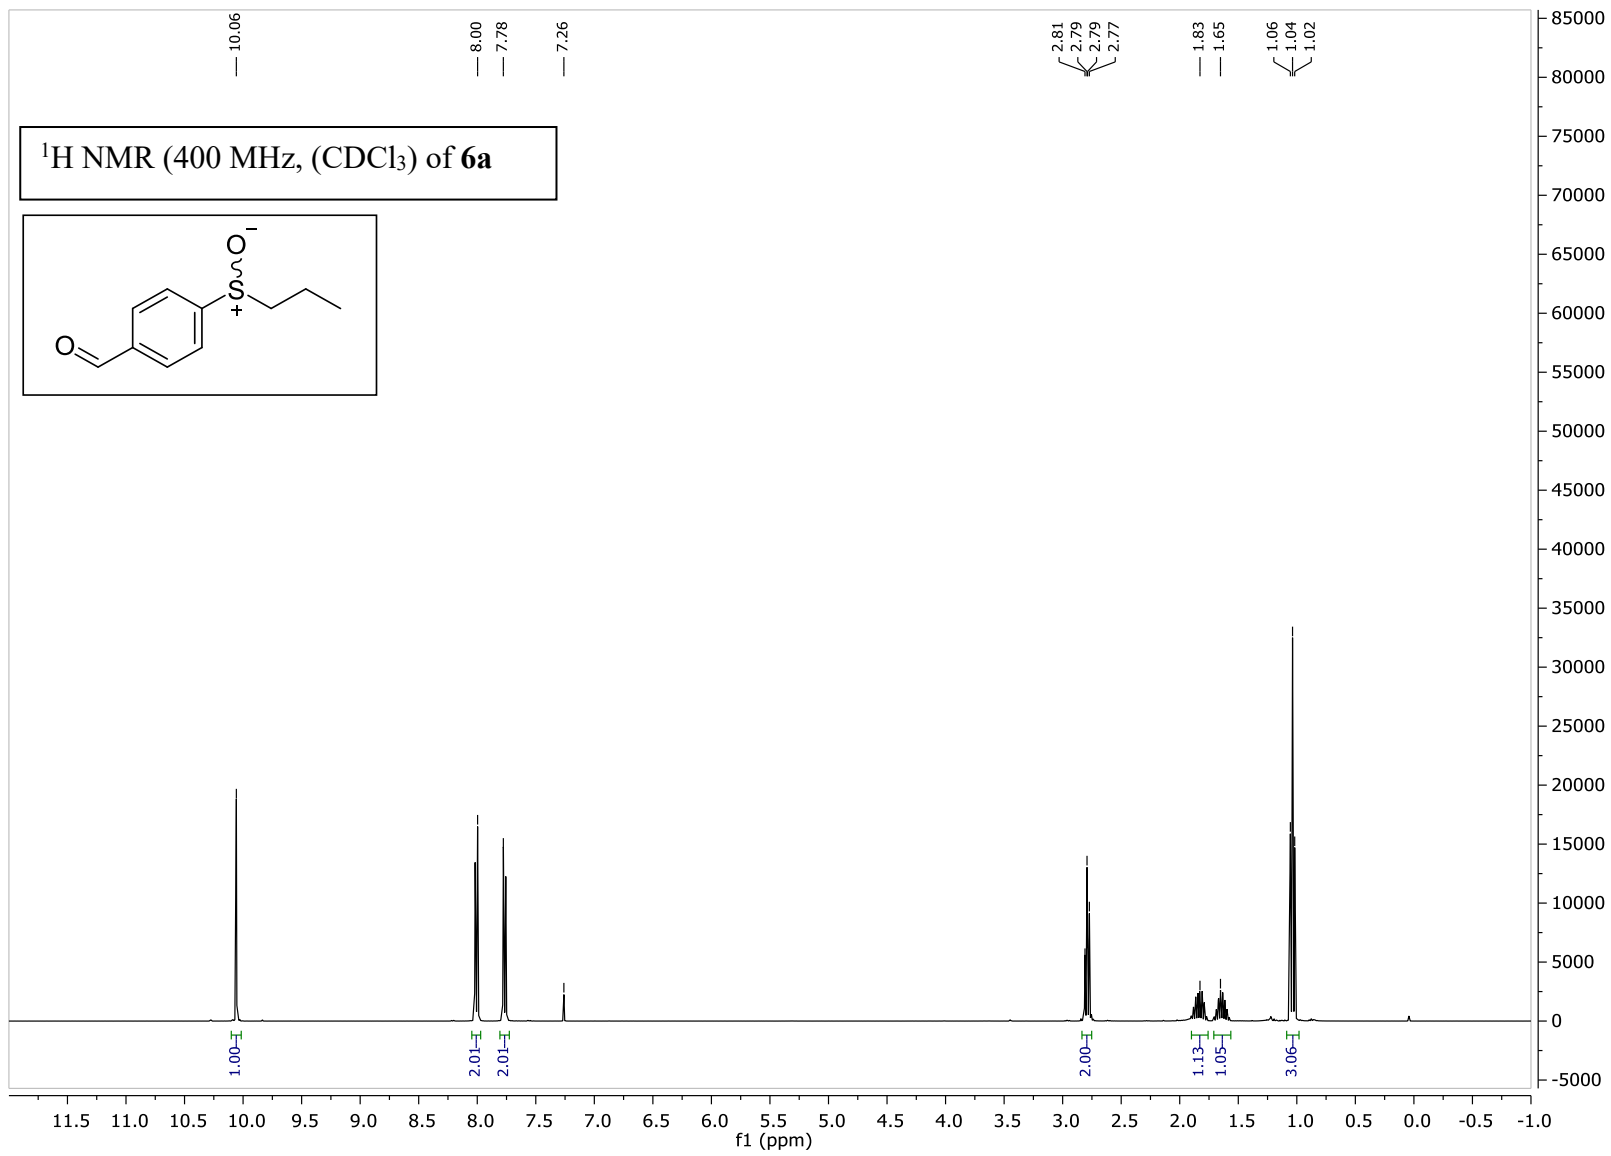

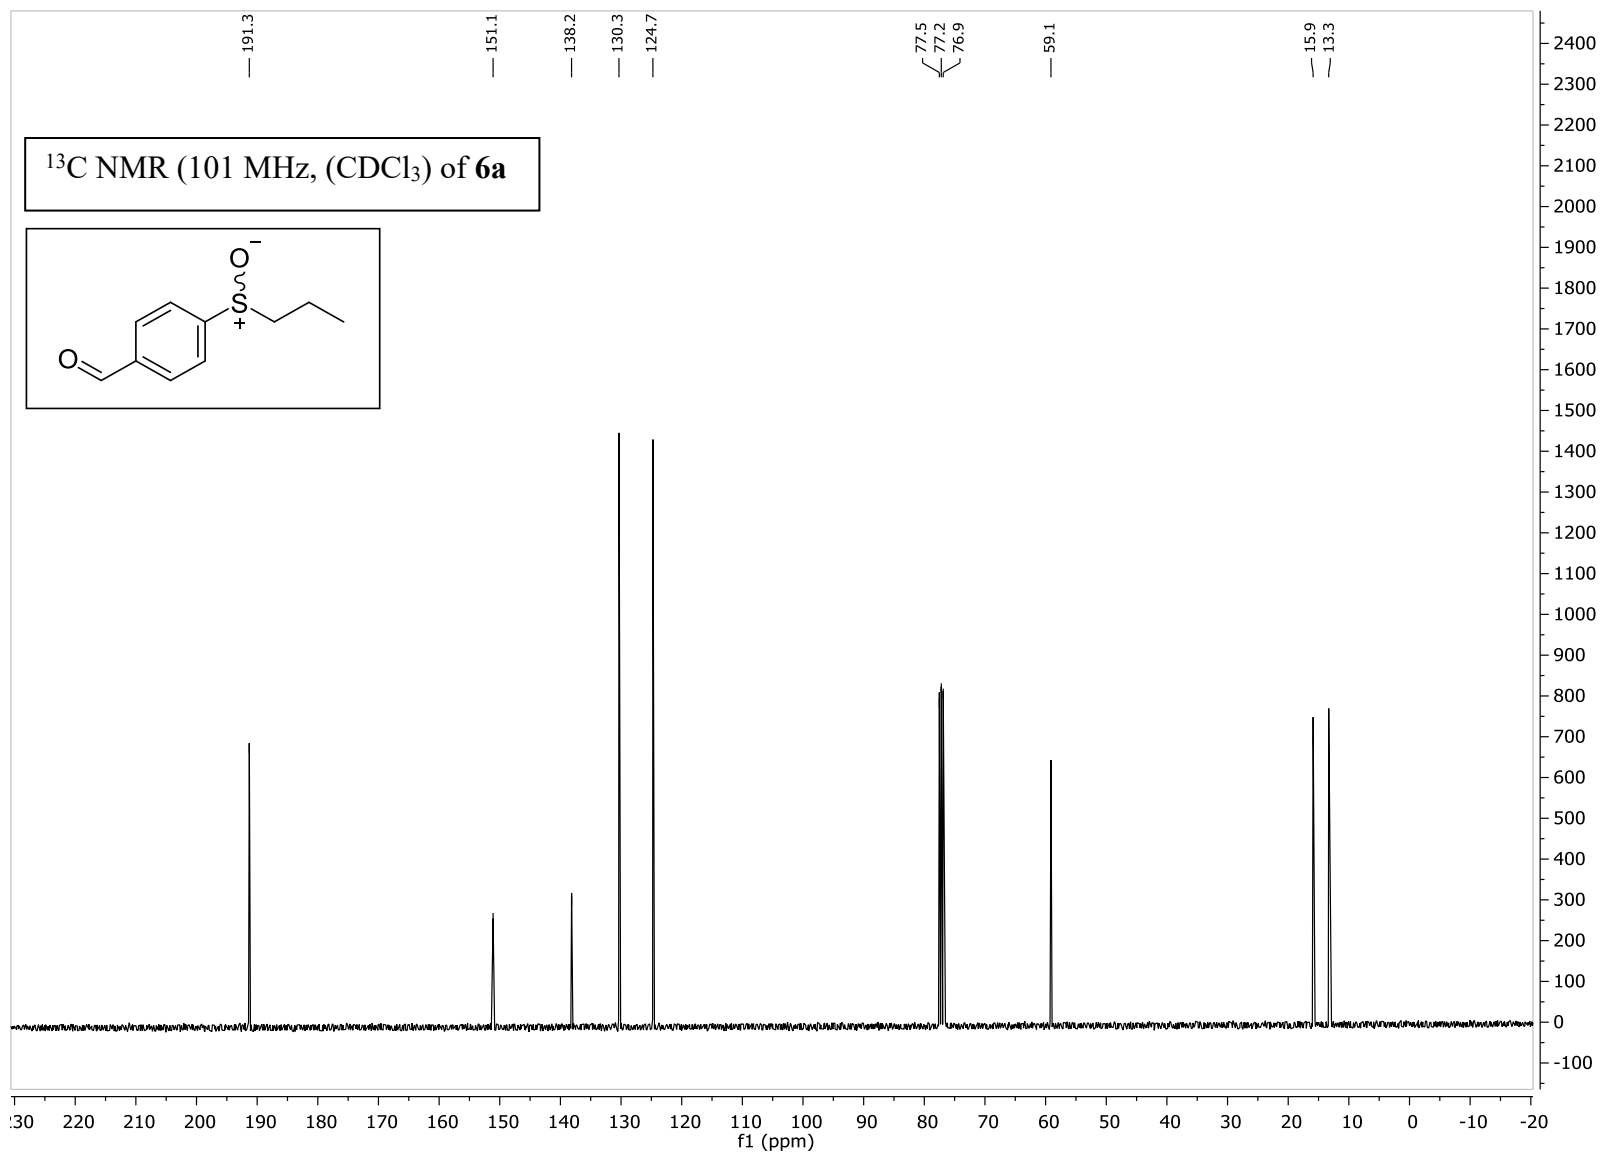

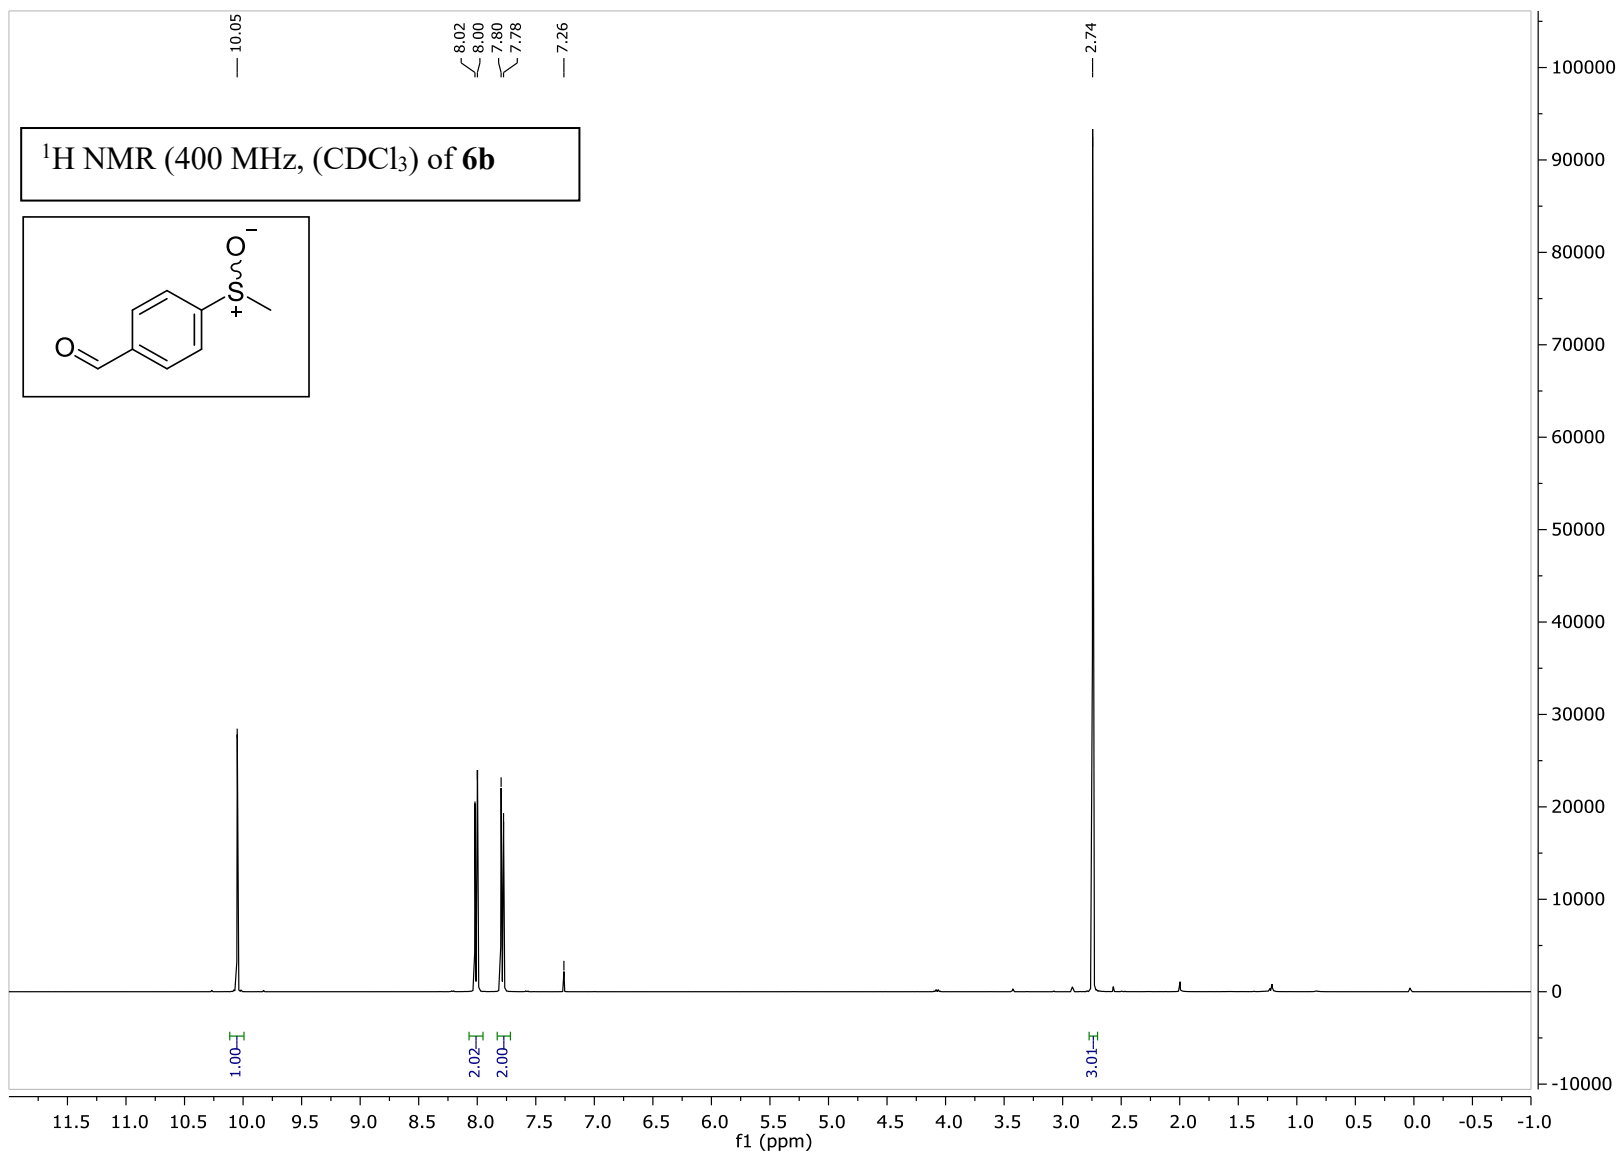

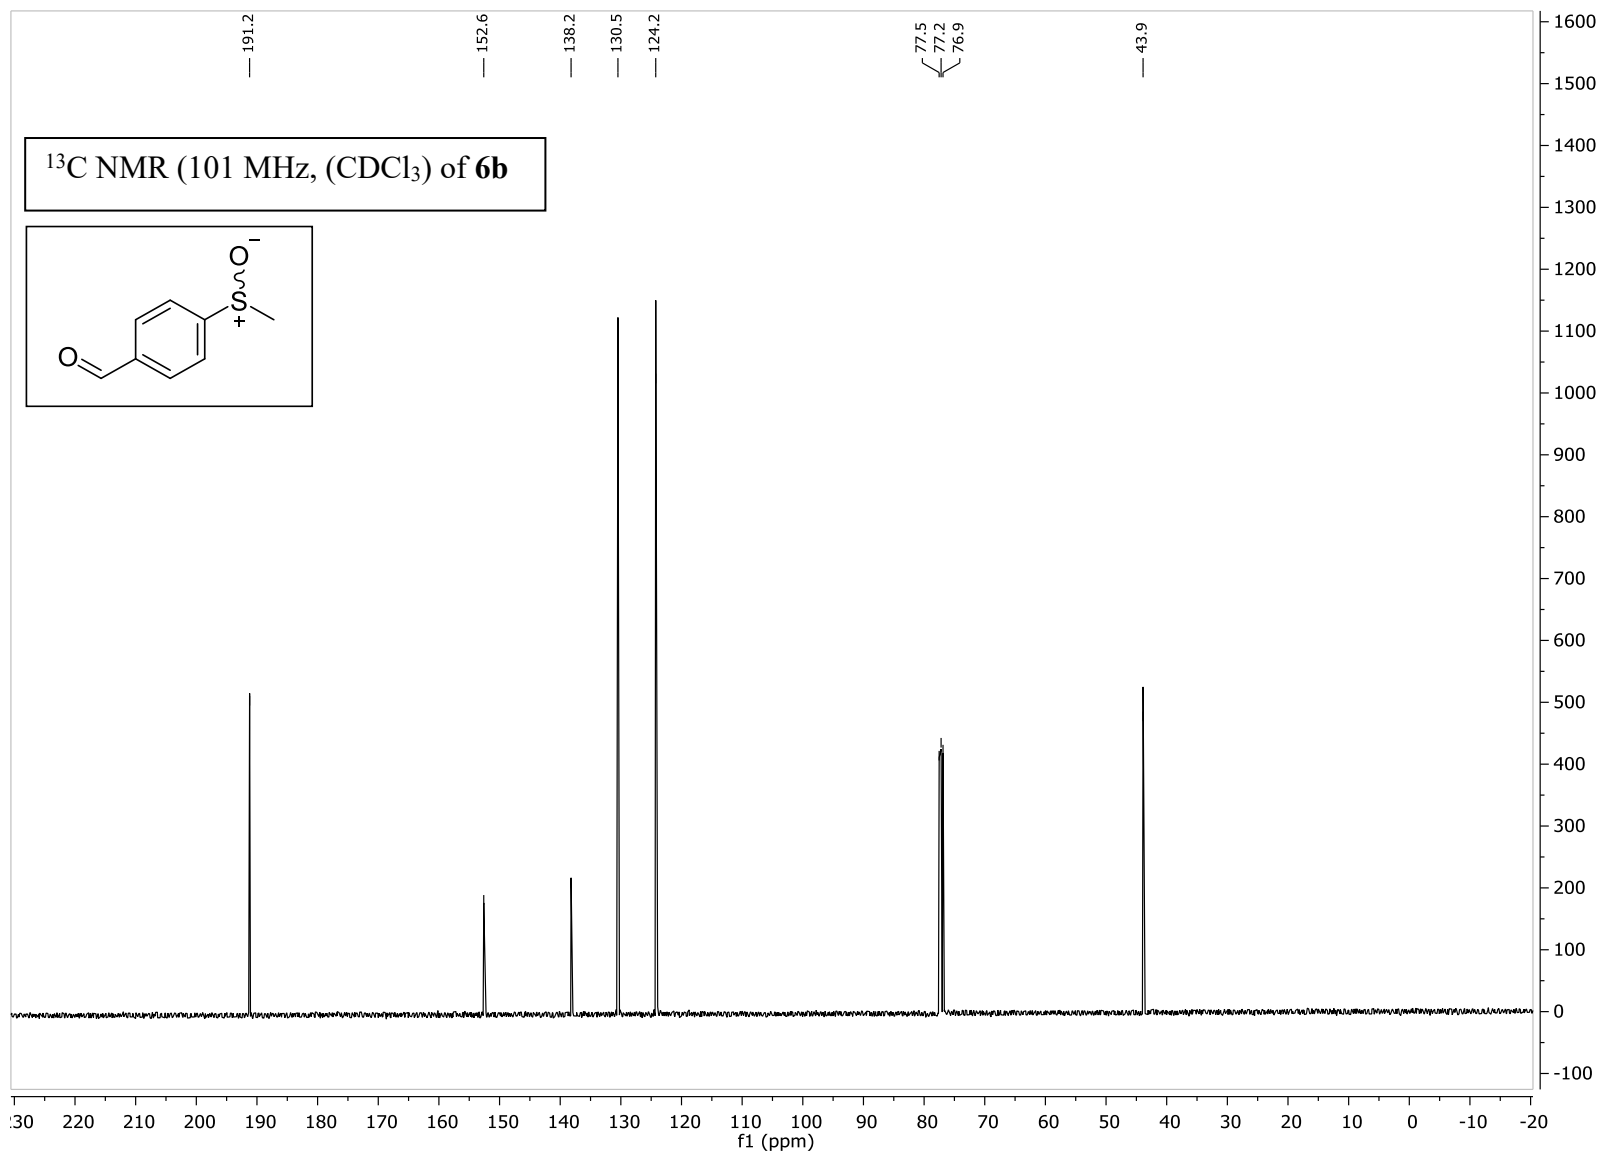

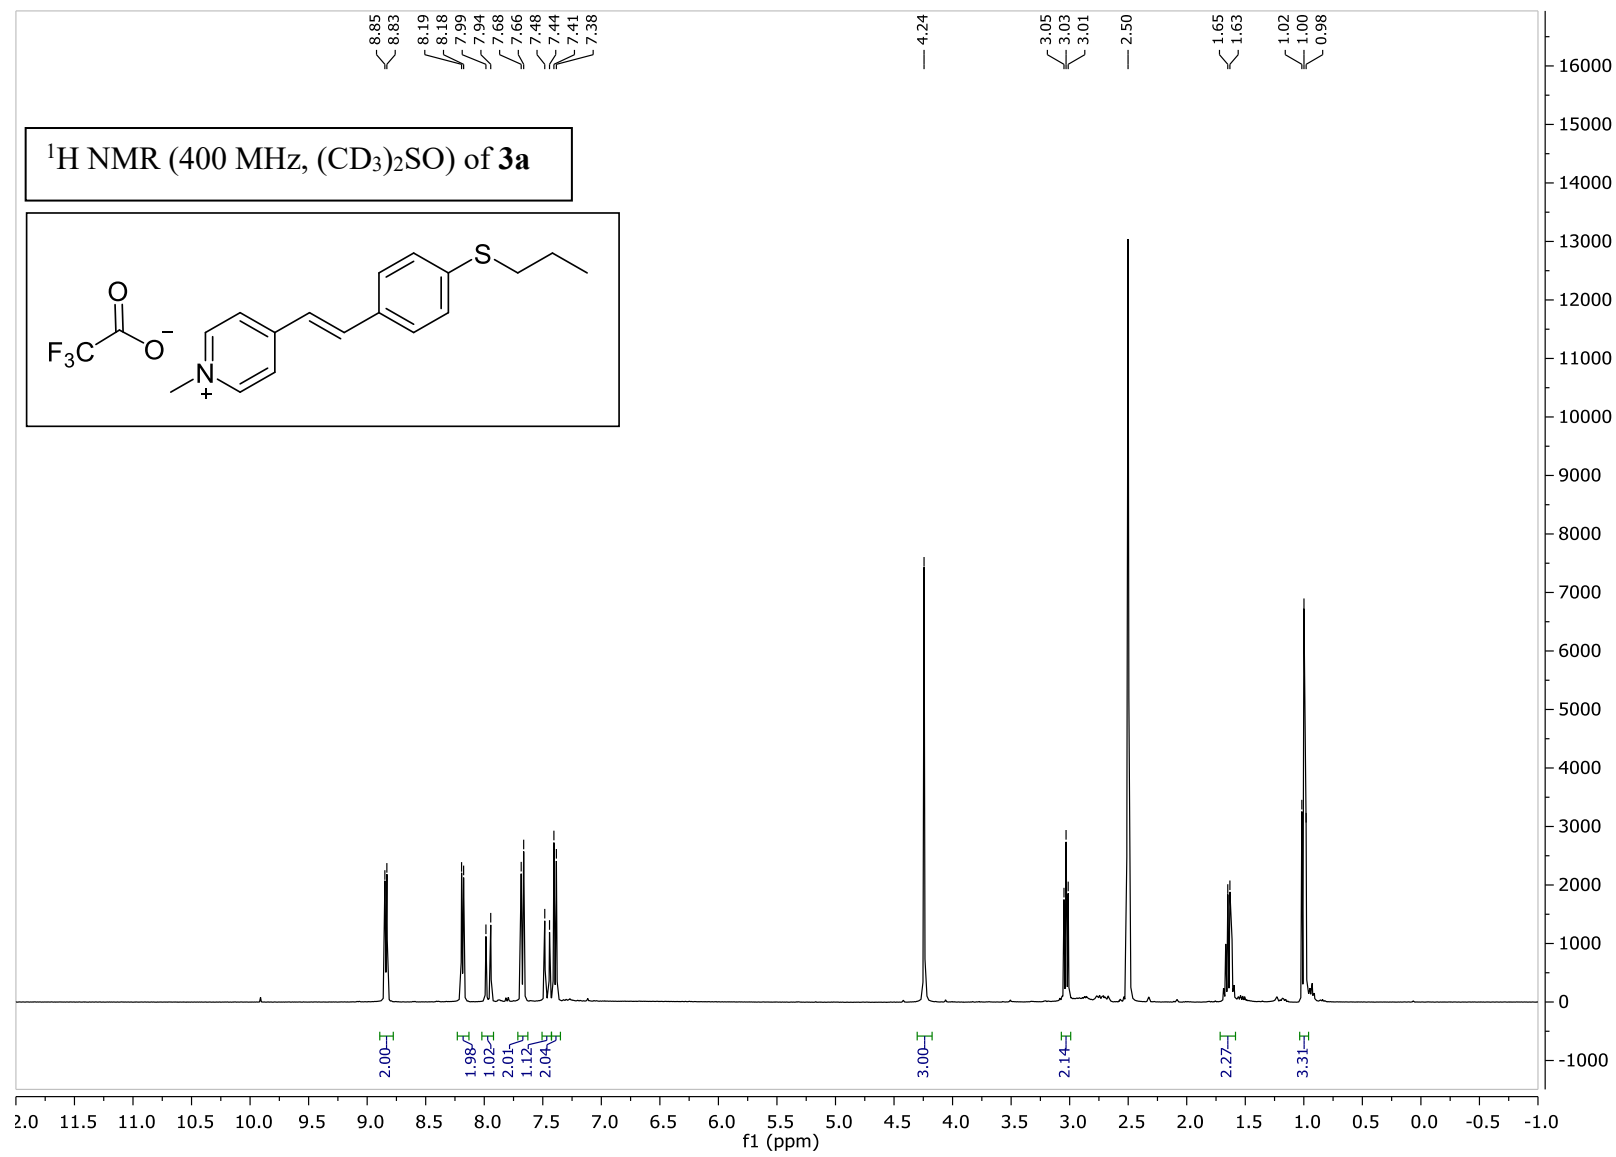

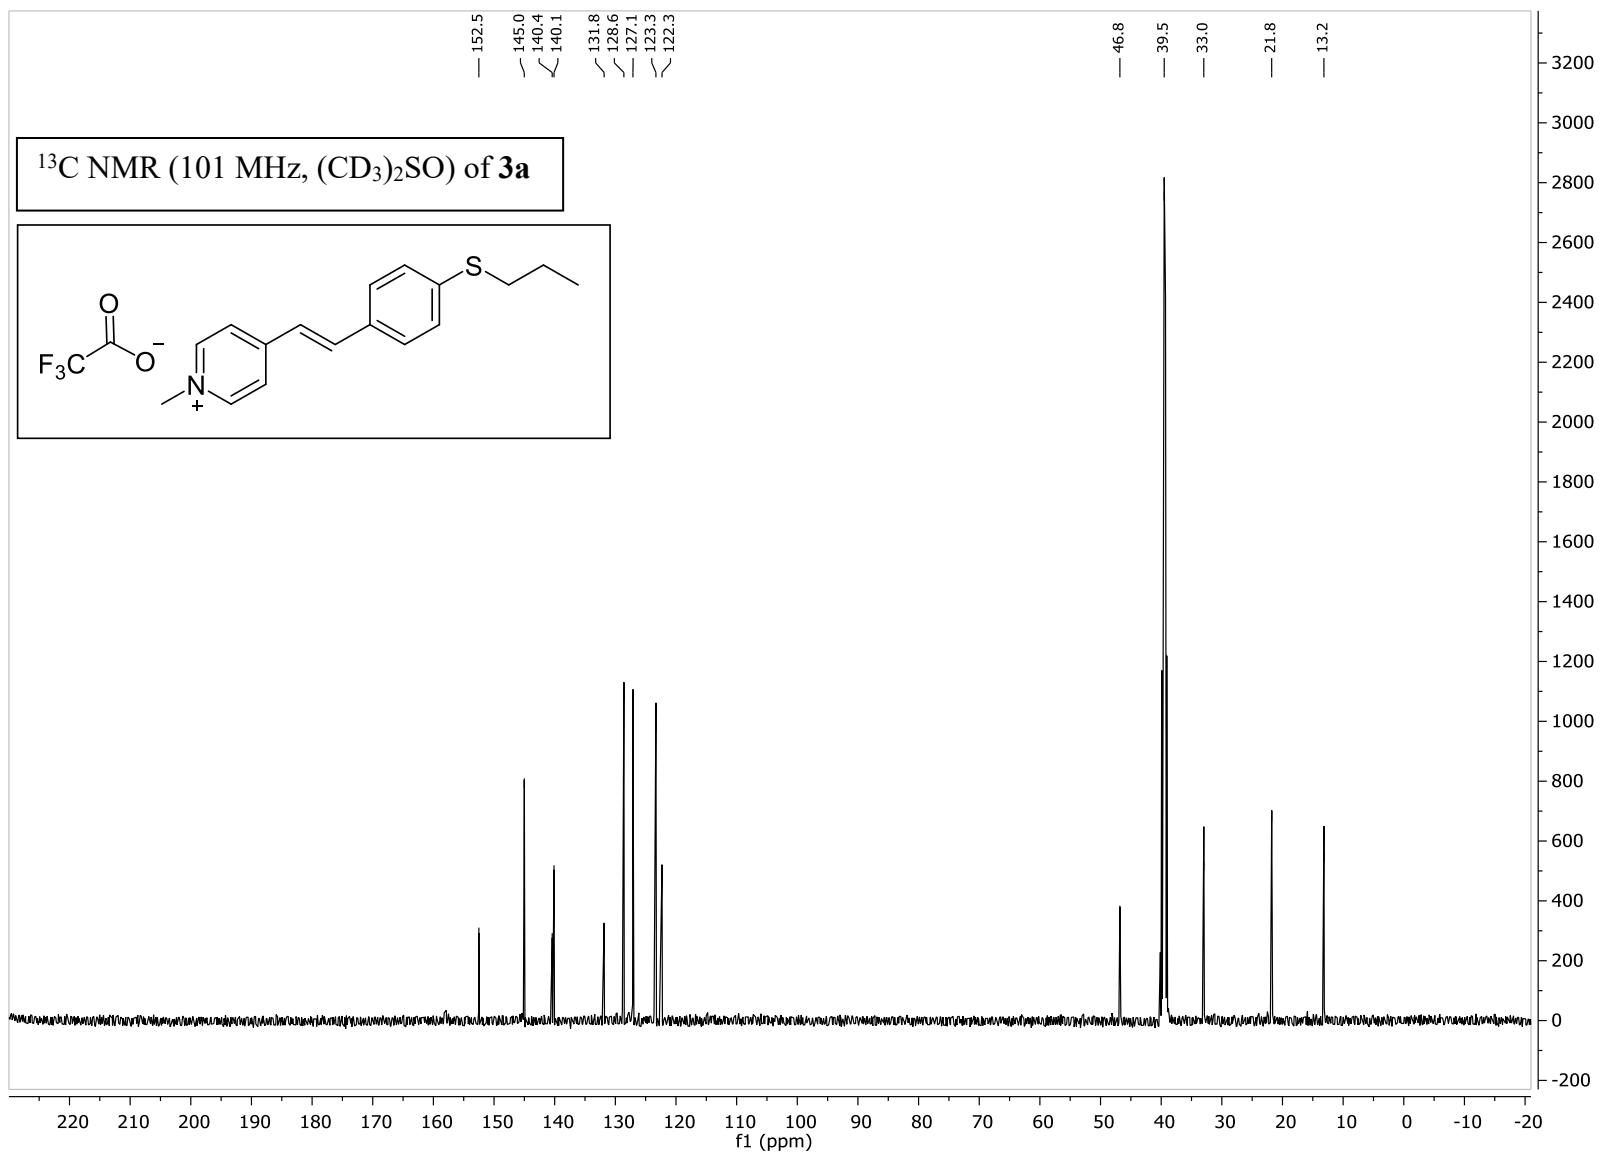

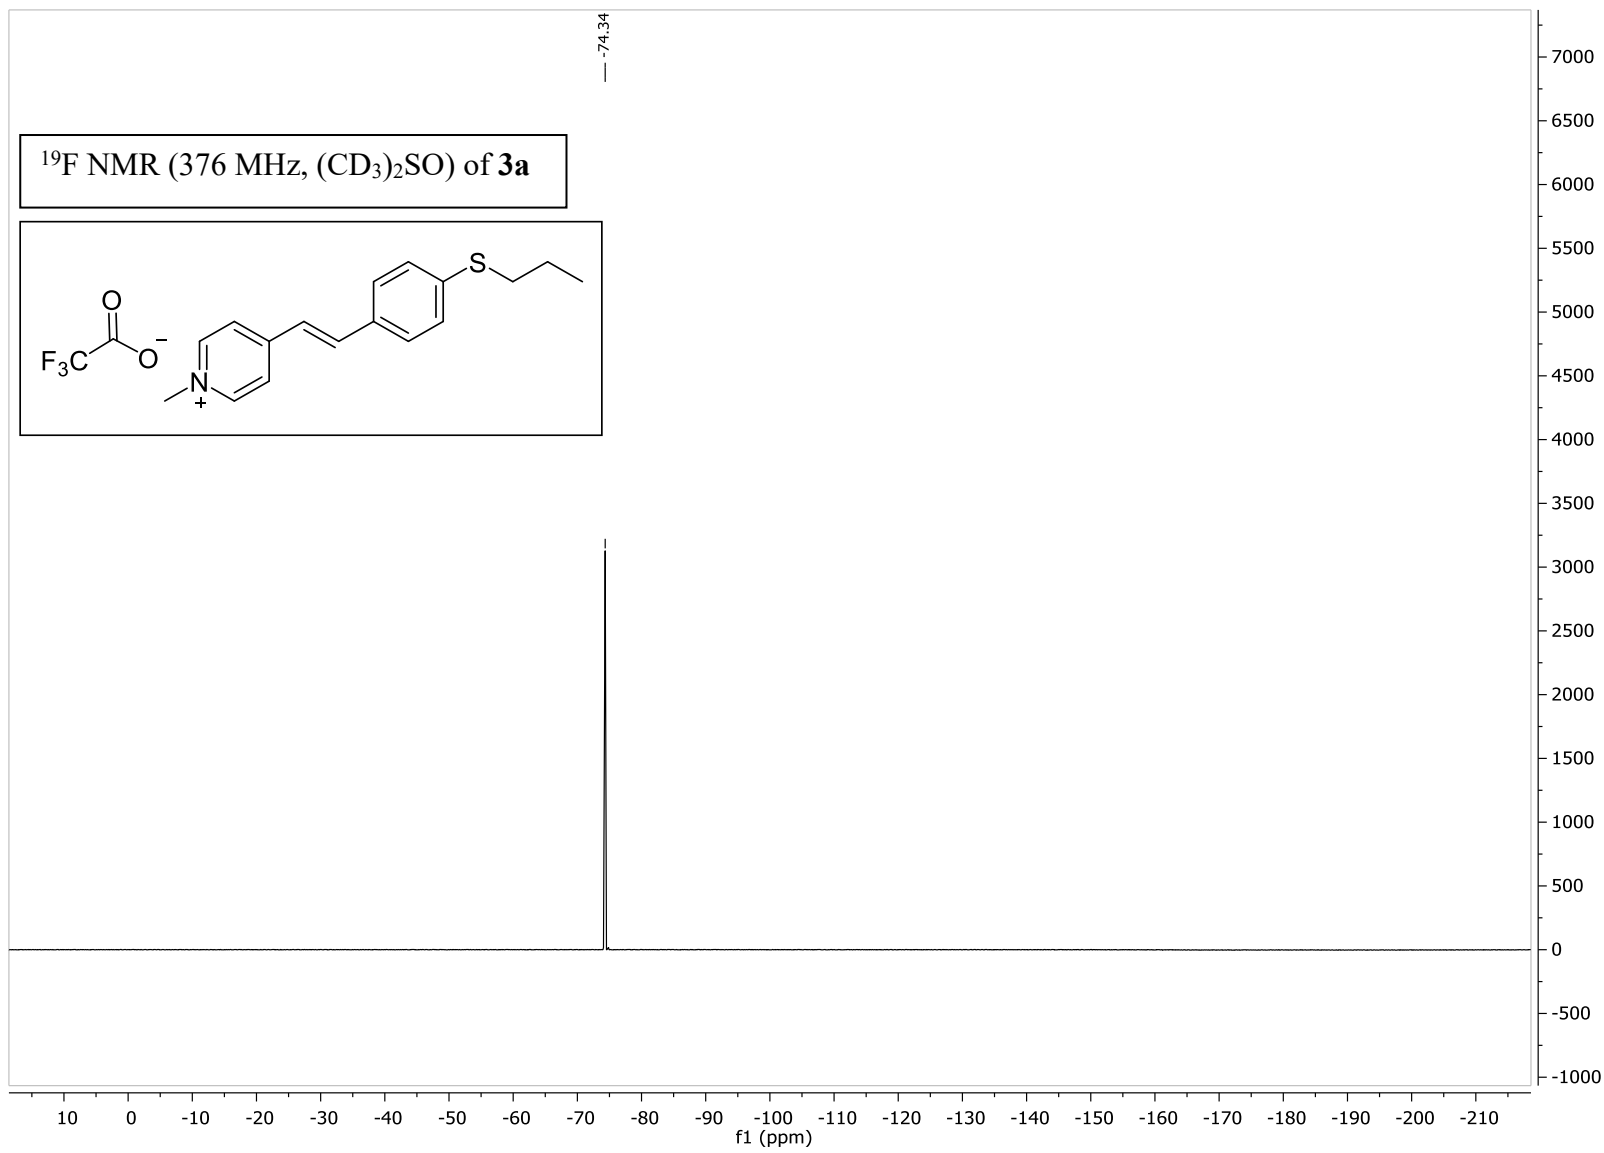

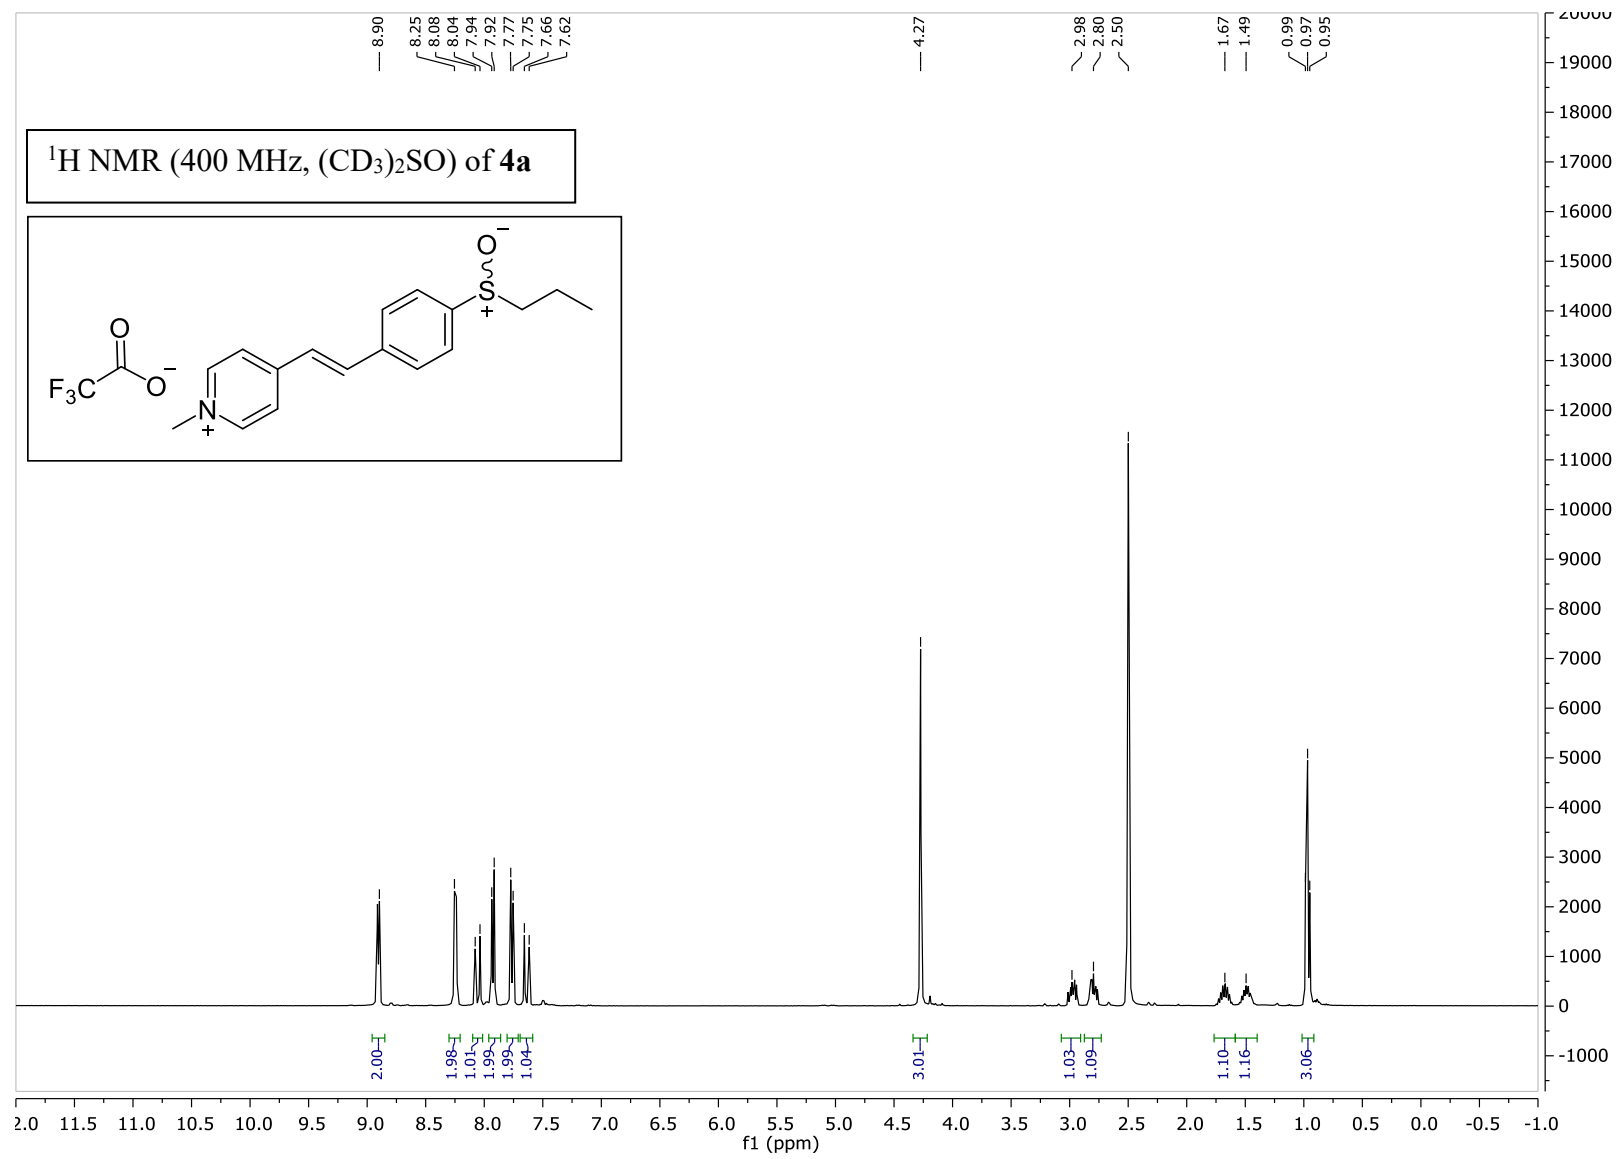



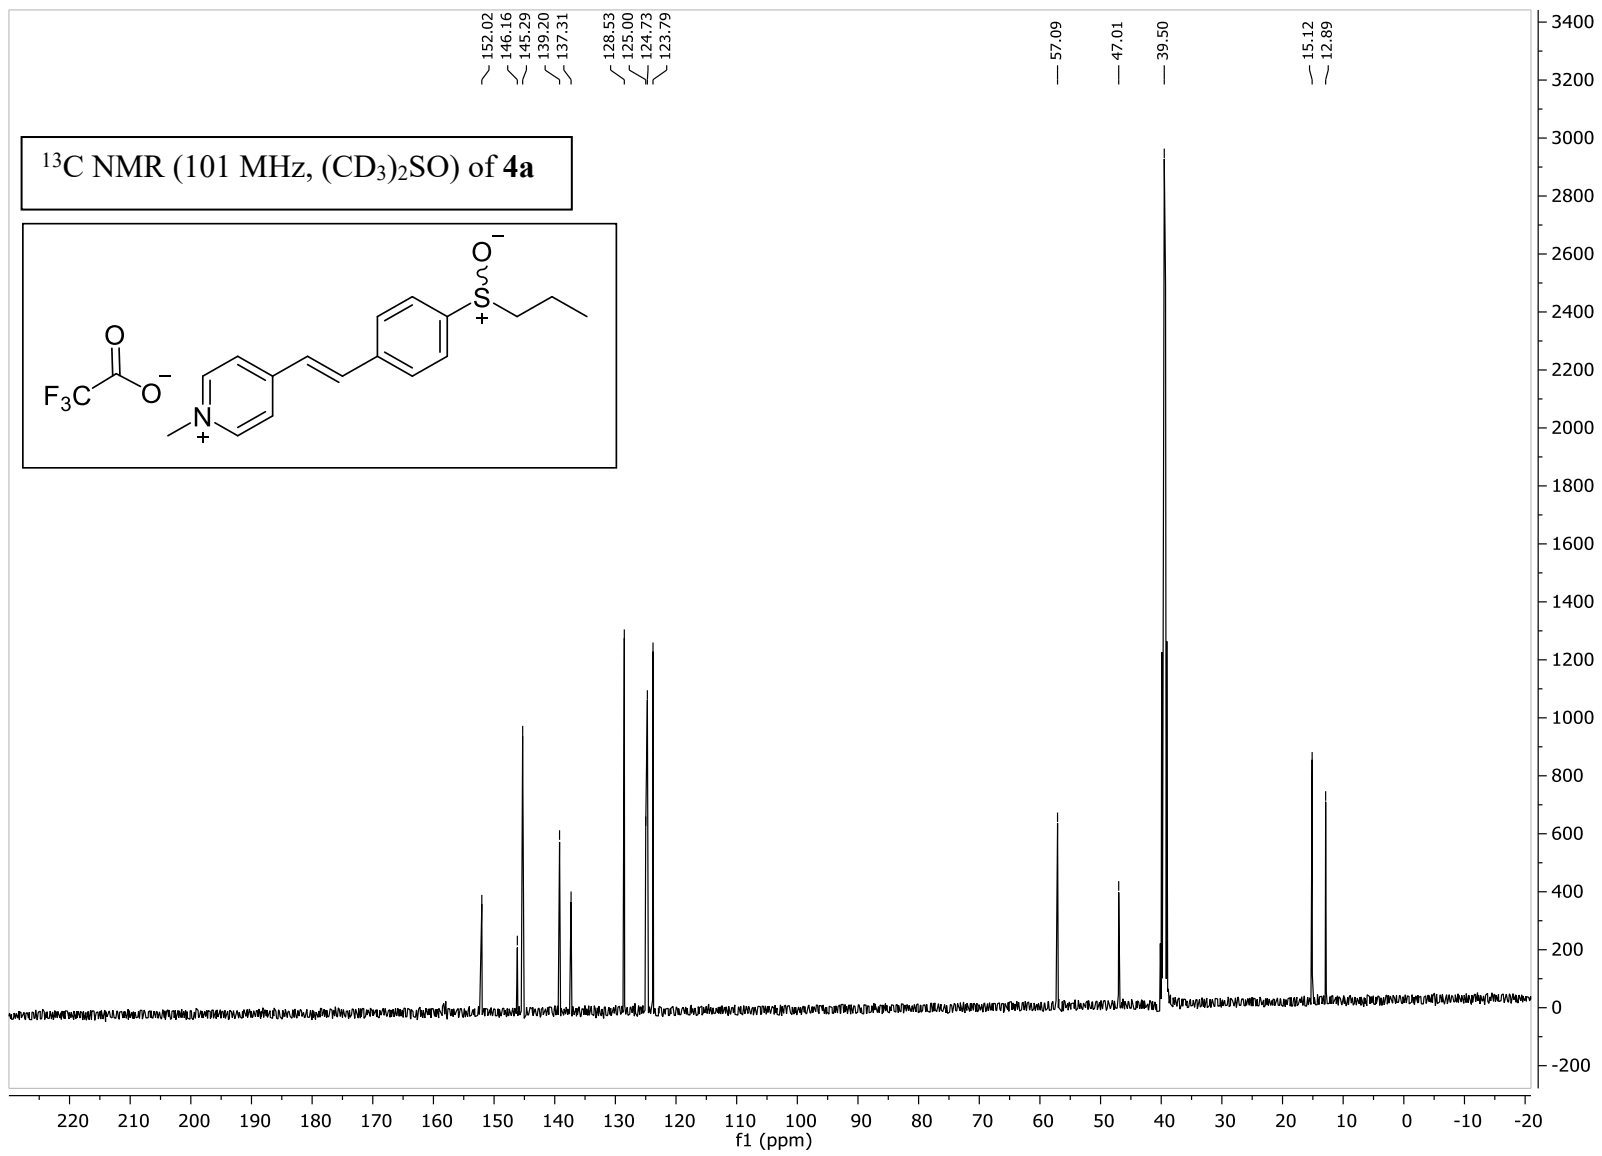

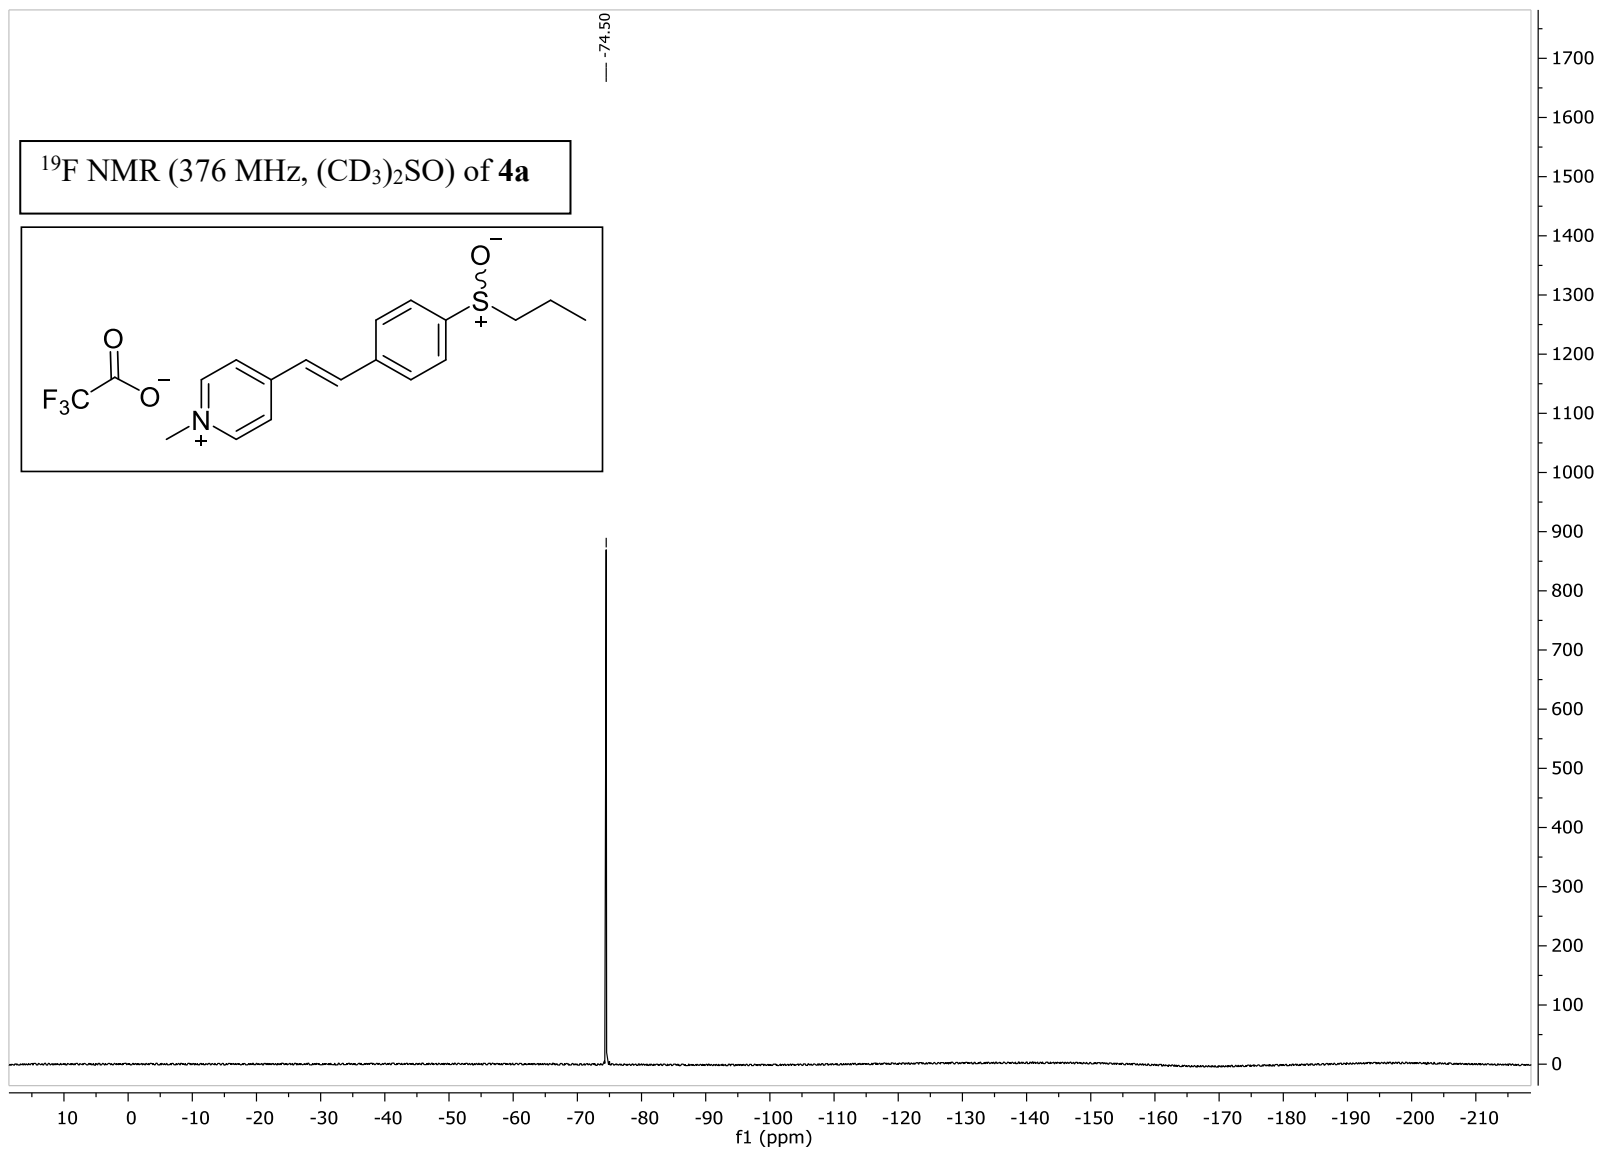

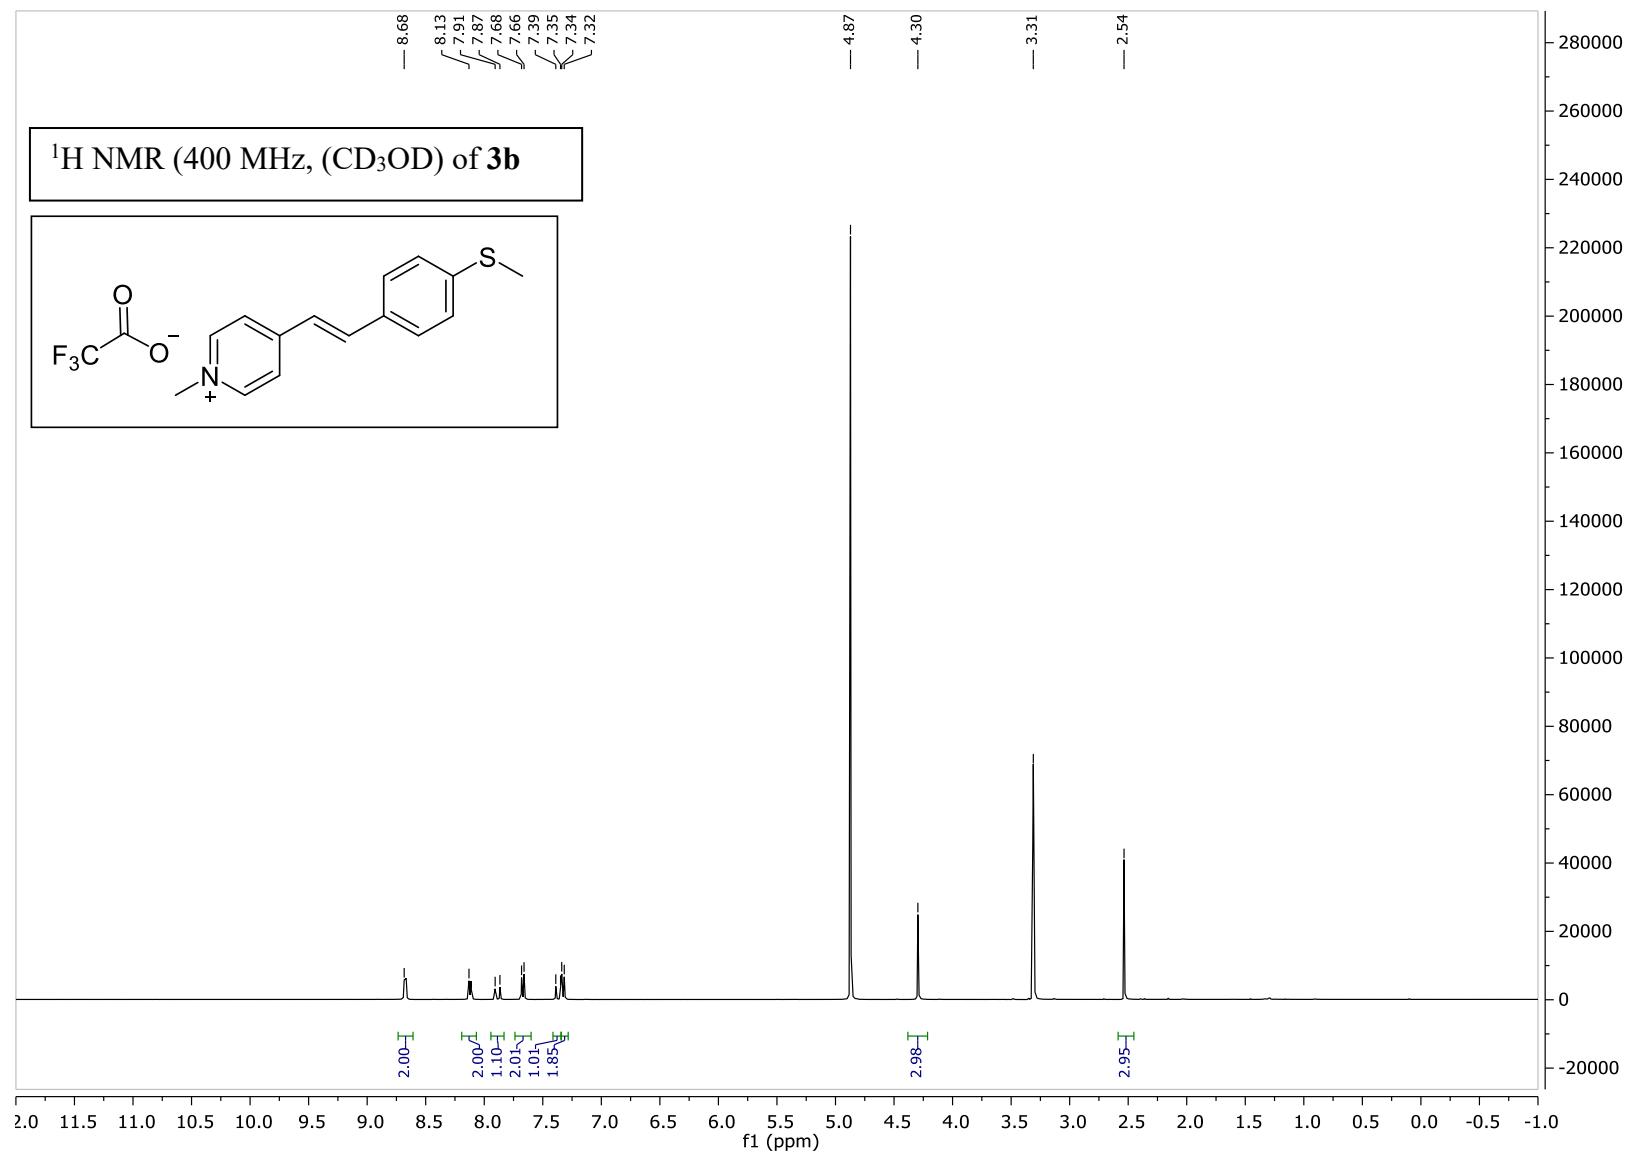

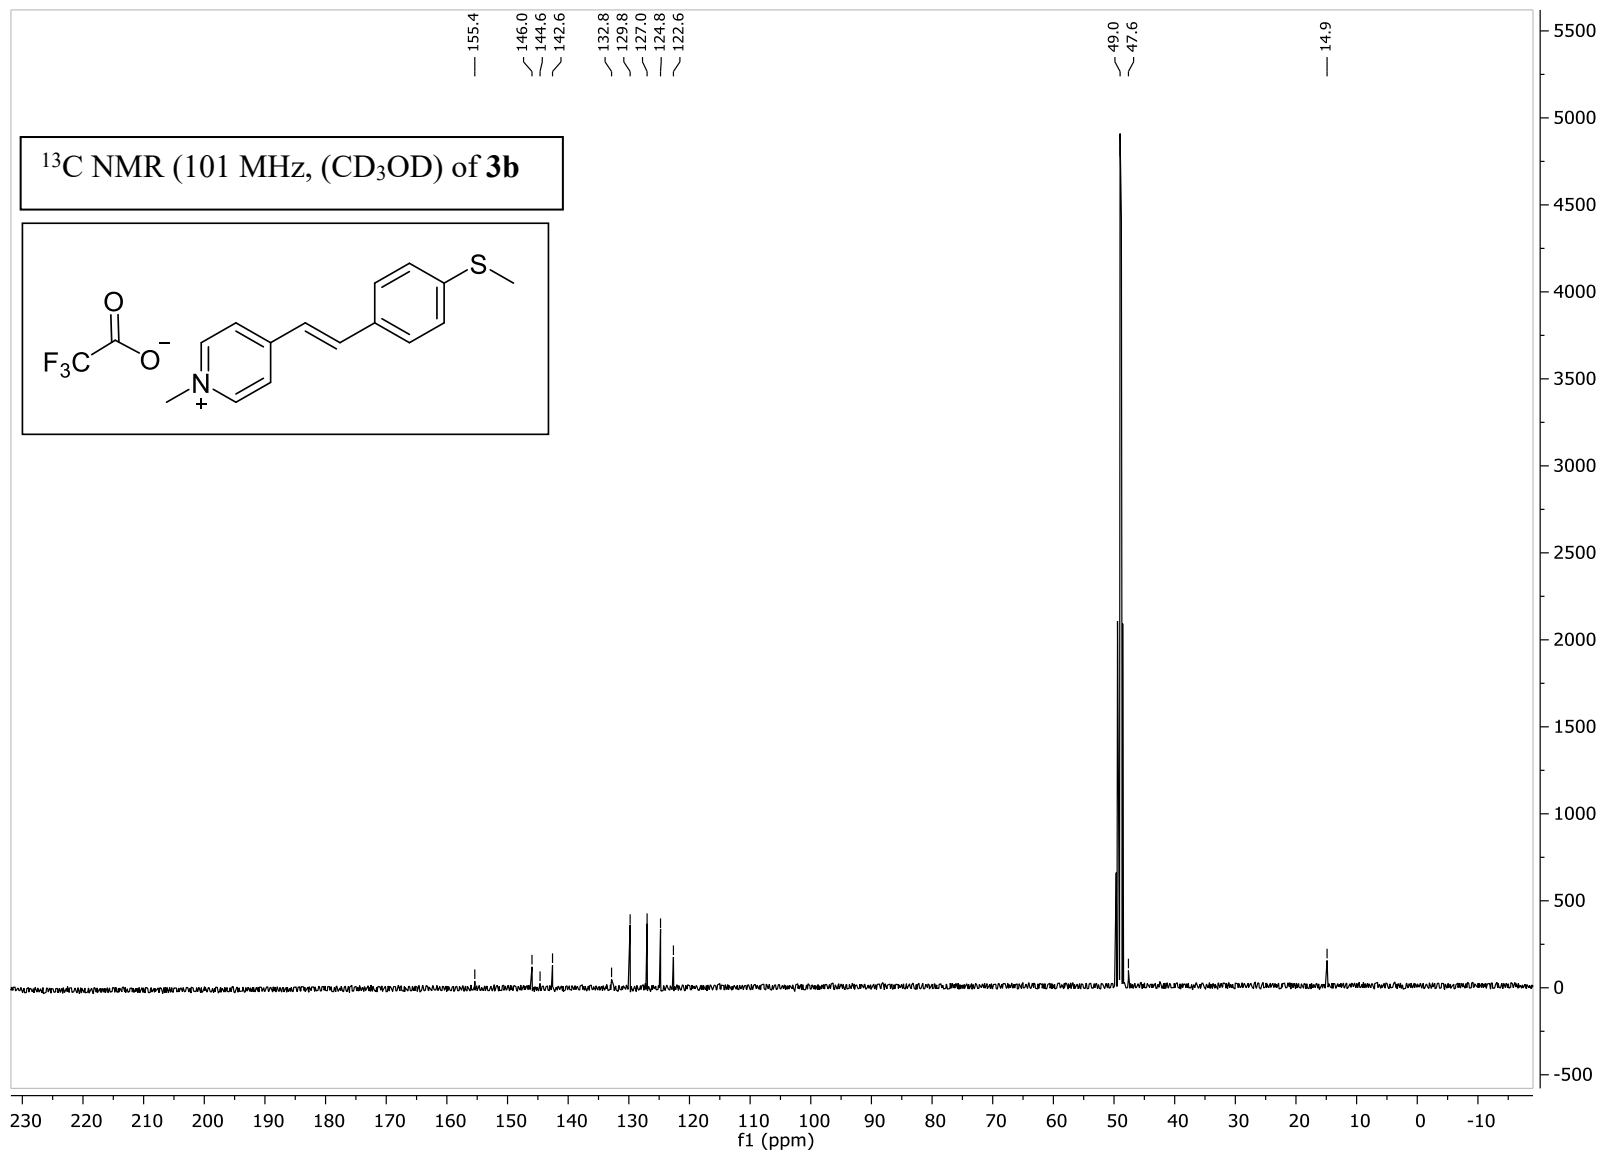

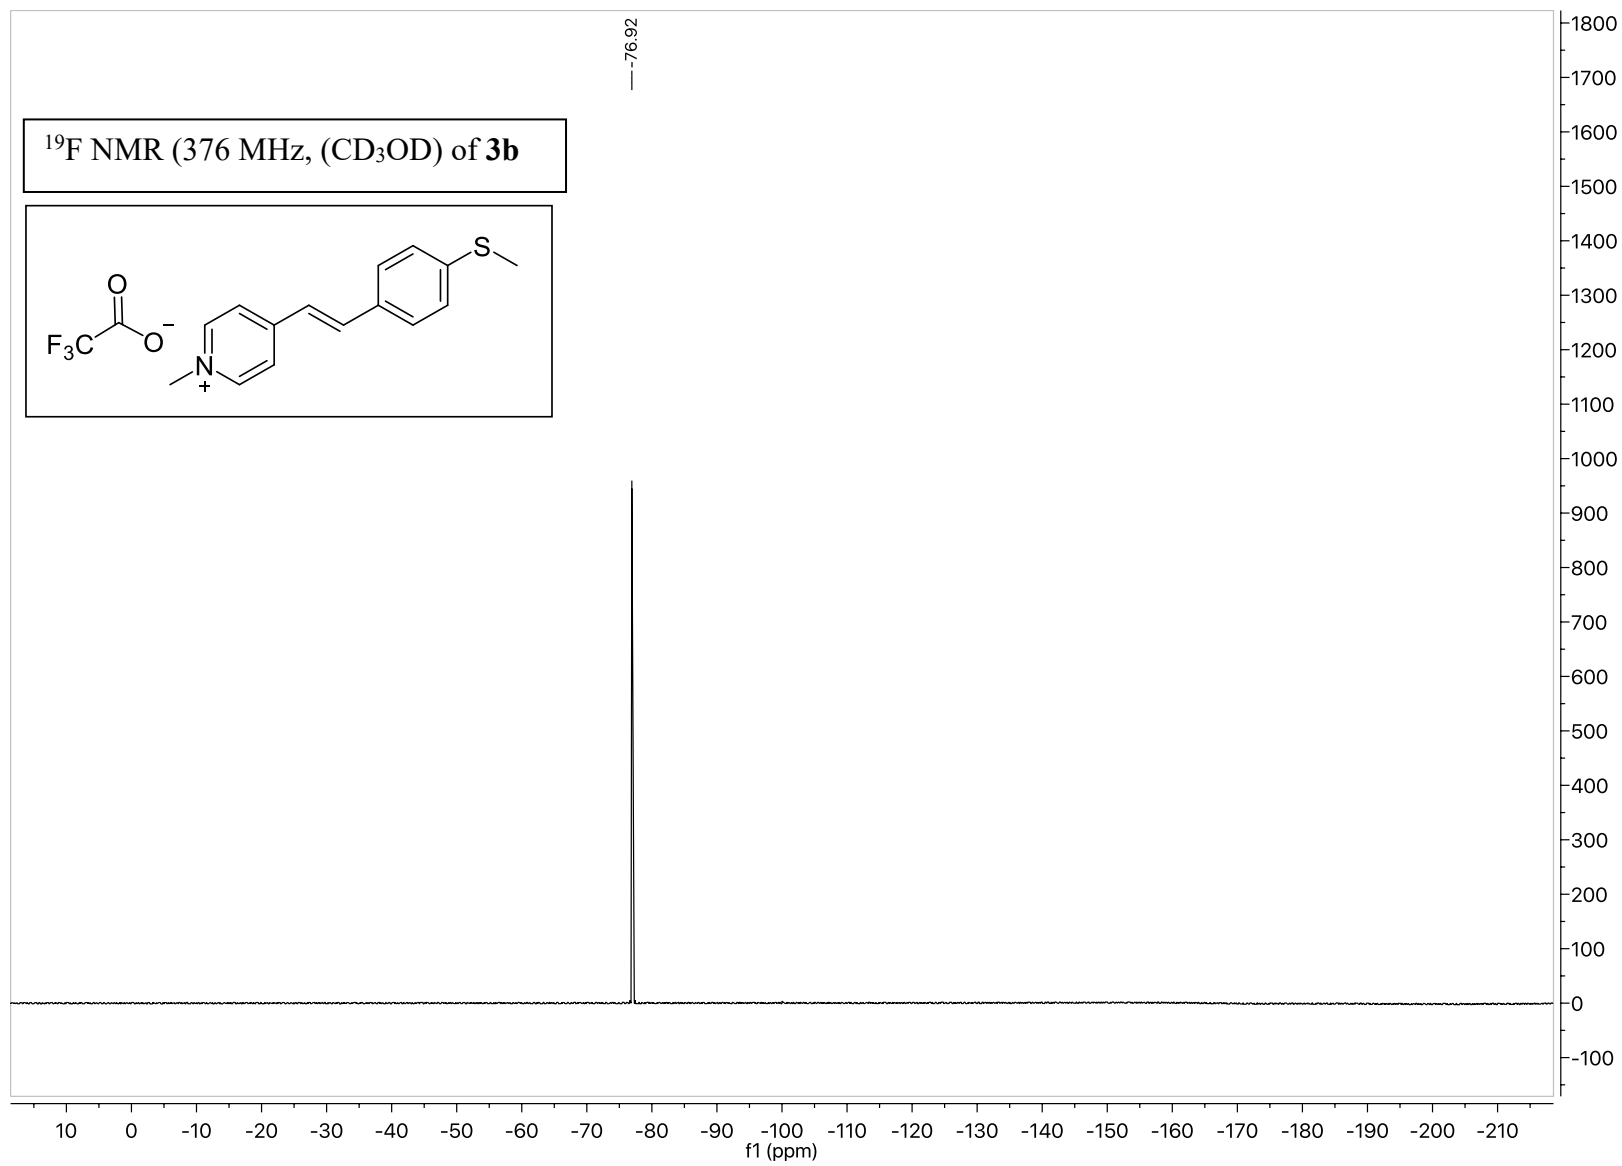

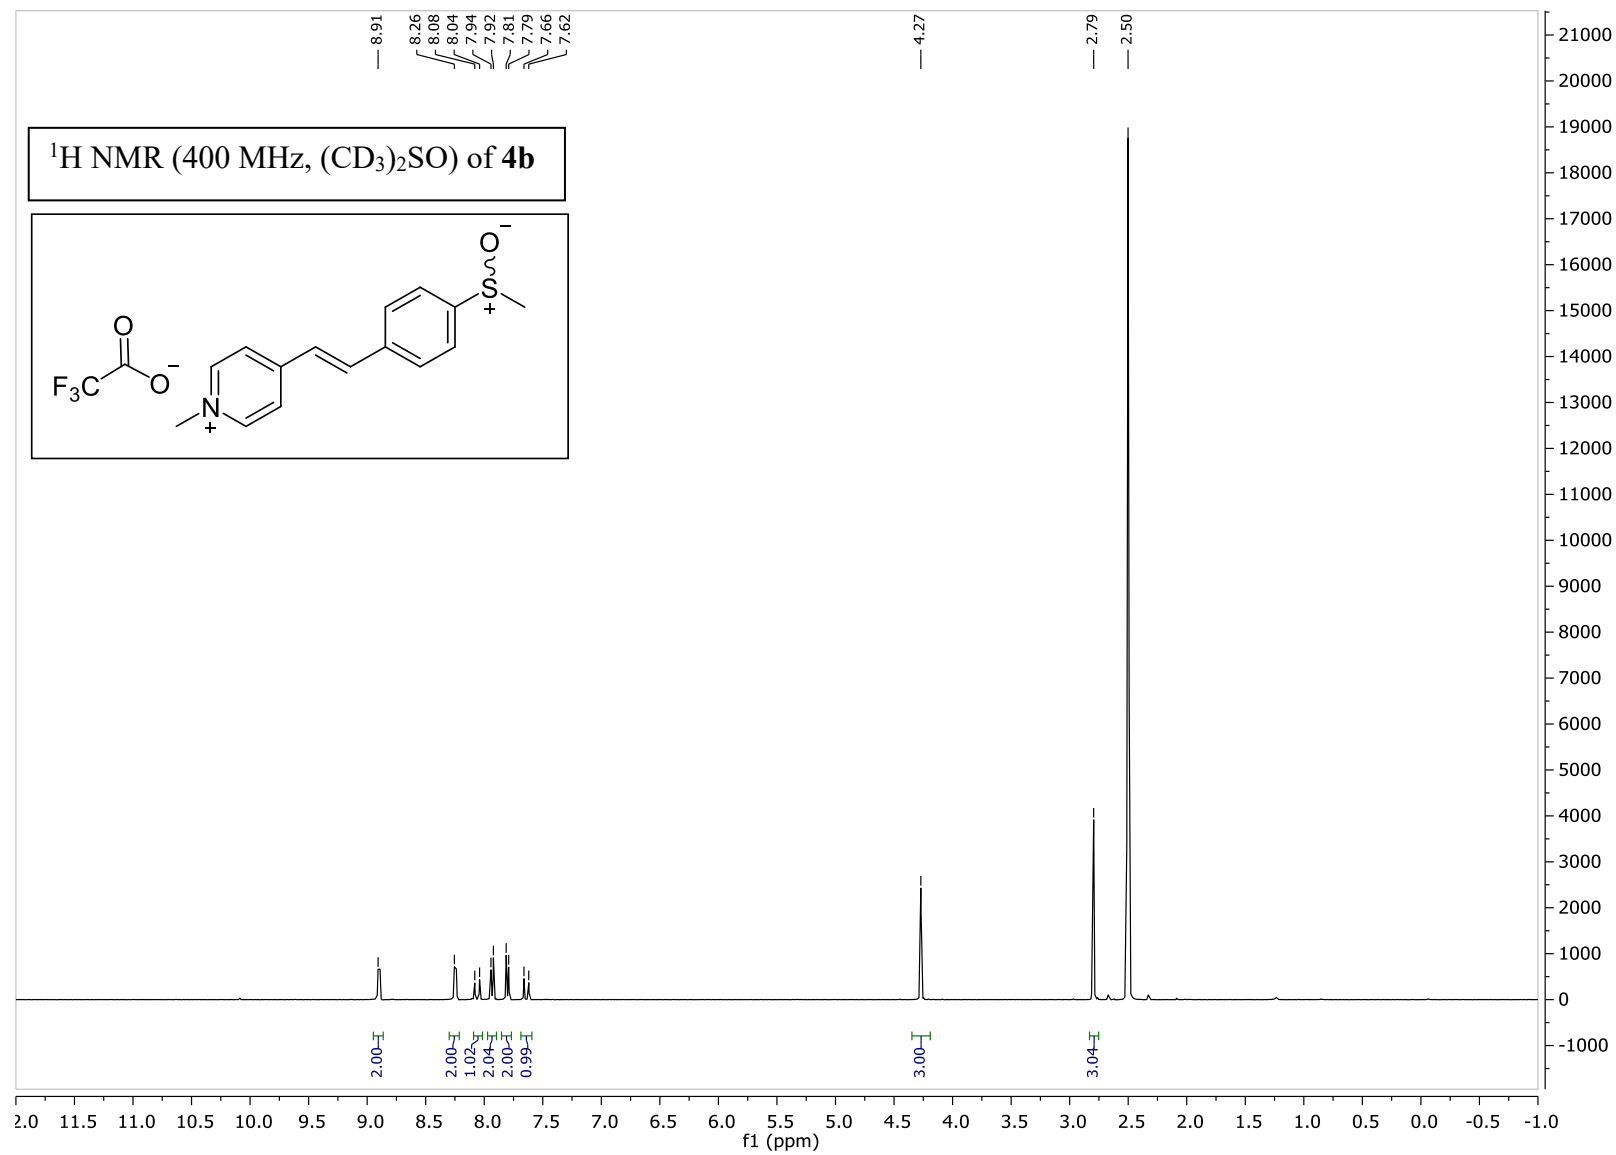

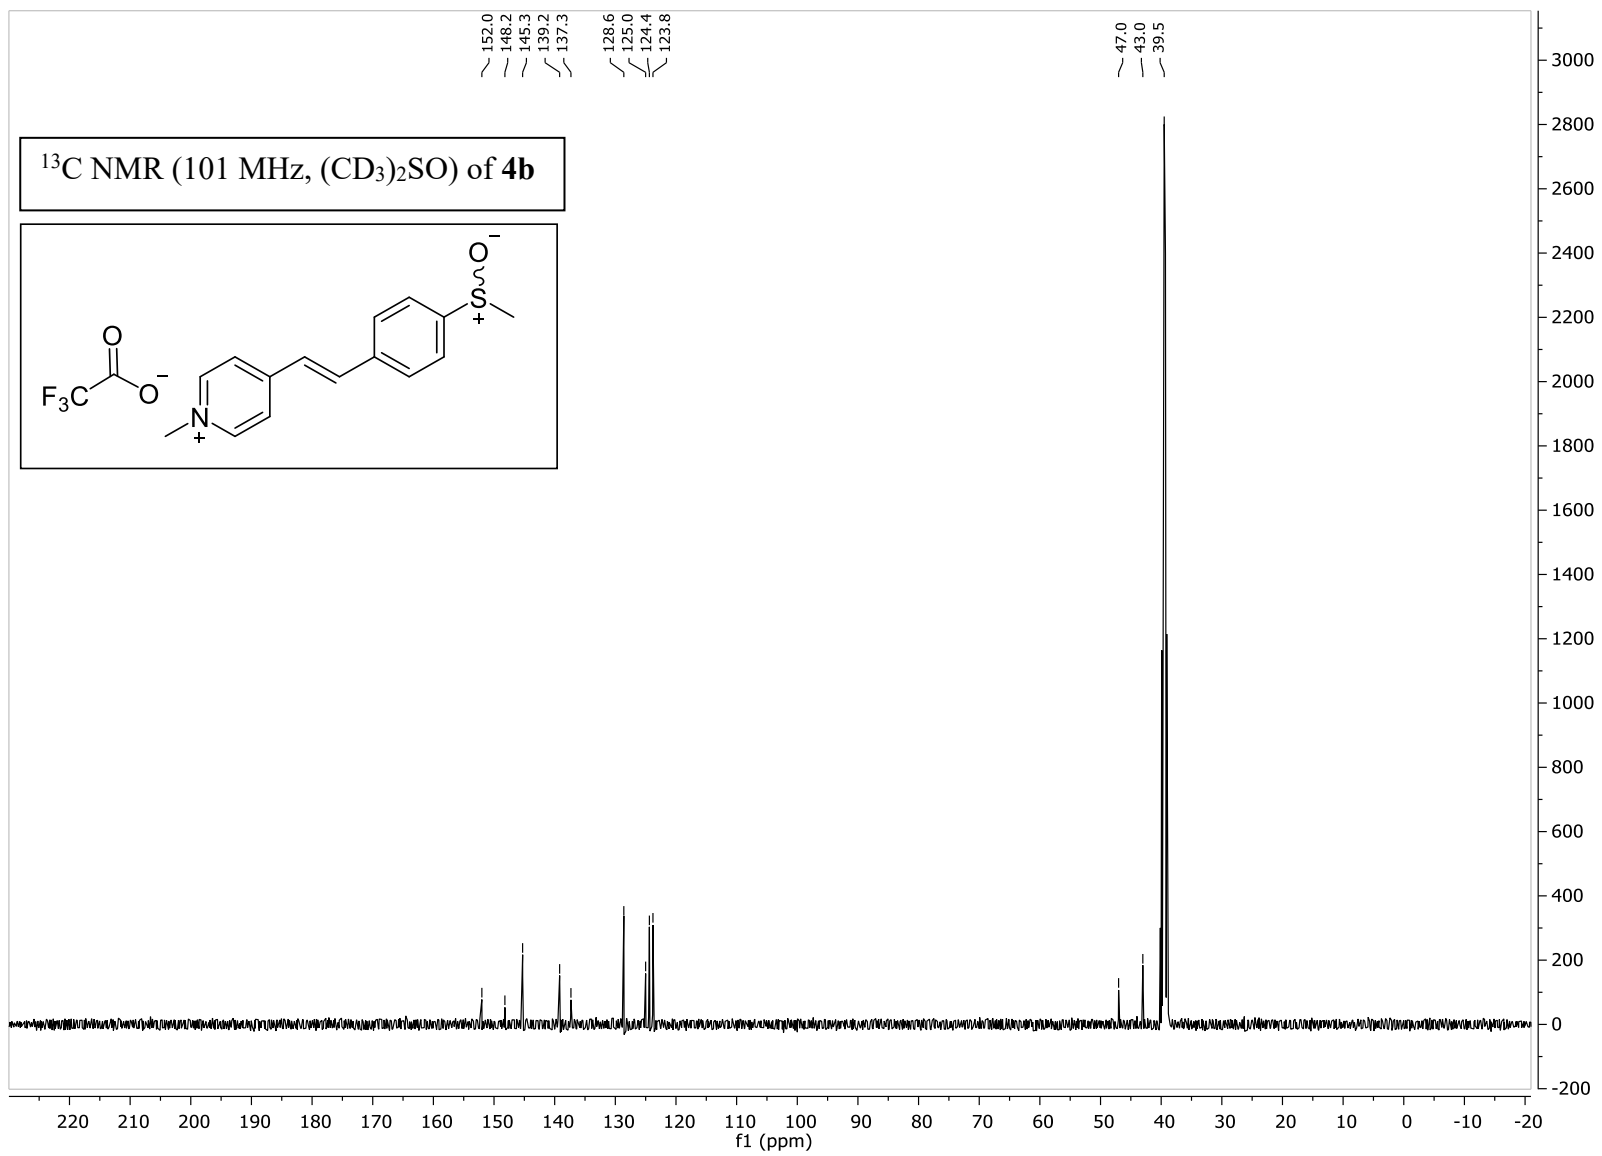

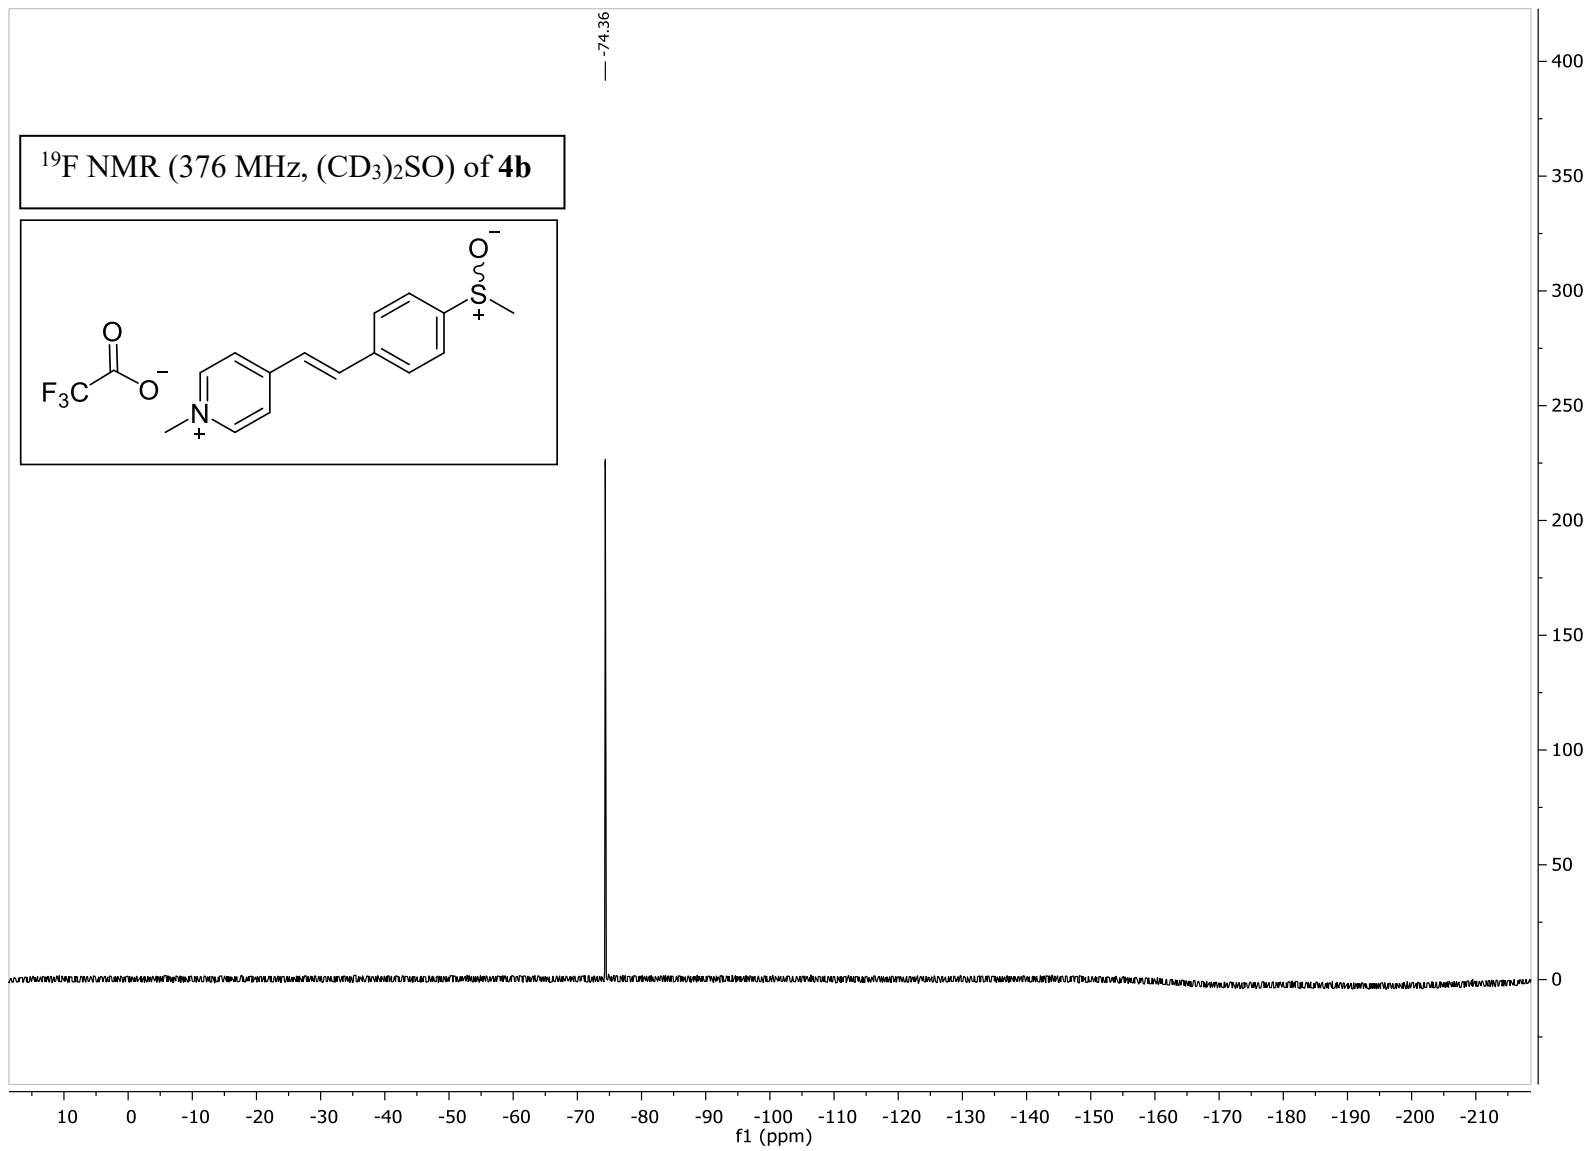

Supplement: d0cc01660h1.pdf [file d0cc01660h1.pdf]
